# Supplementary material for: Chemical characterization and comparative analysis of different parts of Cocculus orbiculatus through UHPLC-Q-TOF-MS
Source: Royal Society of Chemistry journal article supplement (doi:10.1039/d3ay02251j), 2024-01-01
Supplement: d3ay02251j1.pdf [file d3ay02251j1.pdf]

## Supporting Information

### Chemical characterization and comparative for different parts of *Cocculus orbiculatus* through UHPLC-Q-TOF-MS

**Xiaorui Wang,<sup>a1</sup> Maochen Wei,<sup>a,b1</sup> Lin Qin,<sup>a</sup> Daopeng Tan,<sup>a</sup> Faming  
Wu,<sup>a</sup> Jian Xie,<sup>a</sup> Di Wu,<sup>a</sup> Annian Liu,<sup>a</sup> Jiajia Wu,<sup>c</sup> Xingdong Wu,<sup>\*a</sup> Yuqi  
He<sup>\*\*a</sup>**

*a Guizhou Engineering Research Center of Industrial Key-technology for  
Dendrobium Nobile, Zunyi Medical University, Zunyi, Guizhou 563000,  
China*

*b Guiyang Xintian Pharmaceutical Co., Ltd., Guiyang 550000 China*

*c School of Pharmacy, Shanghai Jiao Tong University, Shanghai 200240,  
China;*

**\*\* Corresponding authors:**

E-mail addresses: yqhe.pharm@foxmail.com (Yu-qi He).

**\* Corresponding author:**

E-mail address: wuxingdong@zmu.edu.cn (Xing-dong Wu).

**1** These authors made equal contributions to this work.

## Contents

**Figure S1** Chemical structures of ten reference compounds of *C. orbiculatus*.

**Figure S2** Effect of different elution gradients on the resolution of different chromatographic peaks of QC samples of *C. orbiculatus*.

**Figure S3** Effect of different detection wavelengths on the separation of different chromatographic peaks in QC samples of *C. orbiculatus*.

**Figure S4** Influence of different additives in mobile phase water phase on 7 chromatographic peak-peak areas. FA: formic acid; AA: acetic acid.

**Figure S5** HSS T3 column was used to compare the effects of different column temperatures on the peak area of 7 chromatographic peaks.

**Figure S6** Effects of different ion source parameters (Gas 1, Gas 2, Temp and CUR gas) on different chromatographic peaks of QC samples from UPLC-Q-TOF-MS/MS.

**Figure S7** Mass spectra comparison of sincocculine in the reference solution and sample. (A: TOF MS of sincocculine in the reference solution; B: TOF MS/MS of sincocculine in the reference solution; C: TOF MS of sincocculine in the sample; D: TOF MS/MS of sincocculine in the sample.)

**Figure S8** Mass spectra comparison of reticuline in the reference solution and sample. (A: TOF MS of reticuline in the reference solution, B: TOF MS/MS of reticuline in the reference solution, C: TOF MS of reticuline in the sample, D: TOF MS/MS of reticuline in the sample.)

**Figure S9** Mass spectra comparison of laurifoline in the reference solution and sample. (A: TOF MS of tetrandrine laurifoline in the reference solution, B: TOF MS/MS of laurifoline laurifoline in the reference solution, C: TOF MS of laurifoline in the sample, D: TOF MS/MS of laurifoline in the sample.)

**Figure S10** Mass spectra comparison of oblongine in the reference solution and sample. (A: TOF MS of tetrandrine oblongine in the reference solution, B: TOF MS/MS of oblongine in the reference solution, C: TOF MS of oblongine in the sample, D: TOF MS/MS of oblongine in the sample.)

**Figure S11** Mass spectra comparison of tetrandrine in the reference solution and sample. (A: TOF MS of tetrandrine tetrandrine in the reference solution, B: TOF MS/MS of tetrandrine in the reference solution, C: TOF MS of tetrandrine in the sample, D: TOF MS/MS of tetrandrine in the sample.)

**Figure S12** Mass spectra comparison of stepharine in the reference solution and sample. (A: TOF MS of stepharine in the reference solution, B: TOF MS/MS of stepharine in the reference solution, C: TOF MS of stepharine in the sample, D: TOF MS/MS of stepharine in the sample.)

**Figure S13** Mass spectra comparison of chlorogenic acid in the reference solution and sample. (A: TOF MS of chlorogenic acid in the reference solution, B: TOF MS/MS of chlorogenic acid in the reference solution, C: TOF MS of chlorogenic acid in the sample, D: TOF MS/MS of chlorogenic

acid in the sample.)

**Figure S14** Mass spectra comparison of apigenin in the reference solution and sample. (A: TOF MS of apigenin in the reference solution, B: TOF MS/MS of apigenin acid in the reference solution, C: TOF MS of apigenin in the sample, D: TOF MS/MS of apigenin in the sample.)

**Figure S15** Mass spectra comparison of bilobetin in the reference solution and sample. (A: TOF MS of bilobetin in the reference solution, B: TOF MS/MS of bilobetin acid in the reference solution, C: TOF MS of bilobetin in the sample, D: TOF MS/MS of bilobetin in the sample.)

**Figure S16** Mass spectra comparison of magnoline in the reference solution and sample. (A: TOF MS of magnoflorine in the reference solution, B: TOF MS/MS of magnoflorine in the reference solution, C: TOF MS of magnoflorine in the sample, D: TOF MS/MS of magnoflorine in the sample.)

**Table S1** Sample collection information of *C. orbiculatus*.

**Table S2** Detailed information of ten reference compounds of *C. orbiculatus* used in this work.

**Table S3** Related information of creating chemical composition database of the genus *Cocculus* plants.

**Table S4** Ten differential metabolites of *C. orbiculatus* in different parts.

**Table S5** Five differential metabolites of *C. orbiculatus* in different harvest periods.

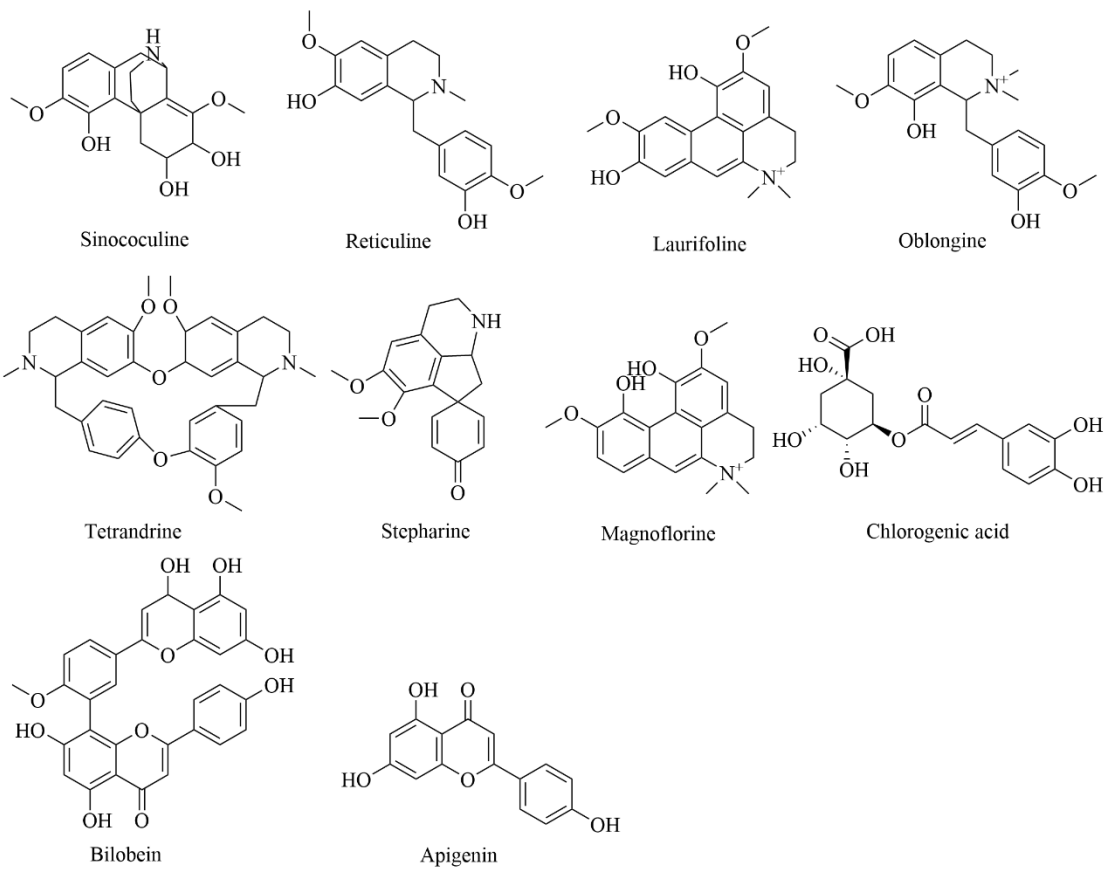

**Figure S1.**

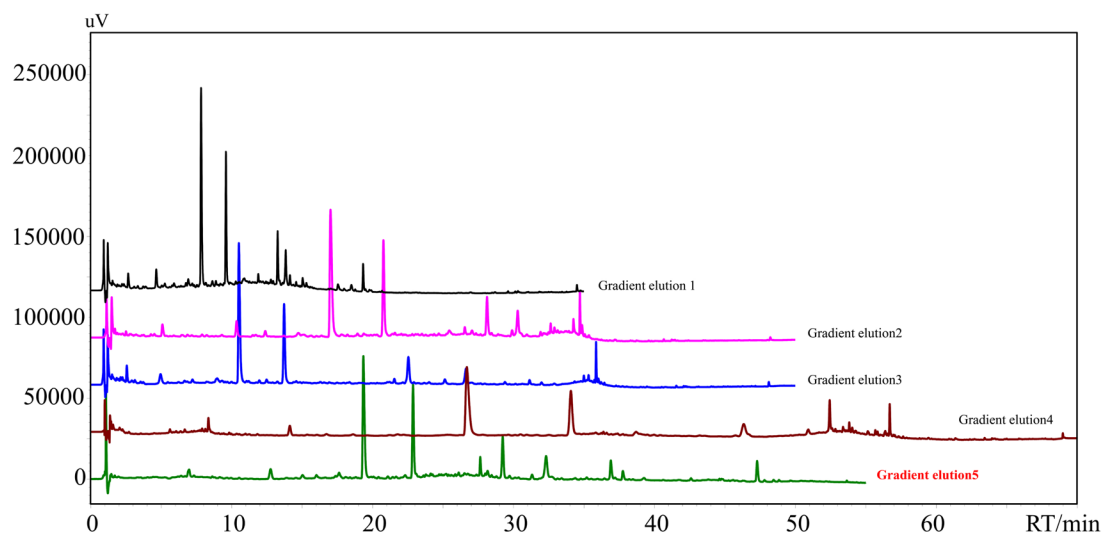

Figure S2

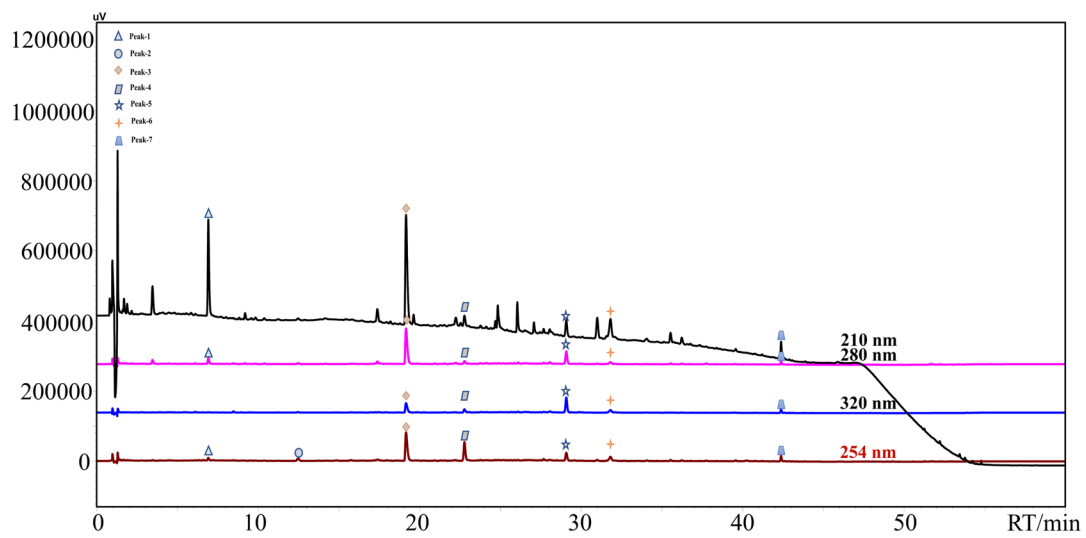

Figure S3

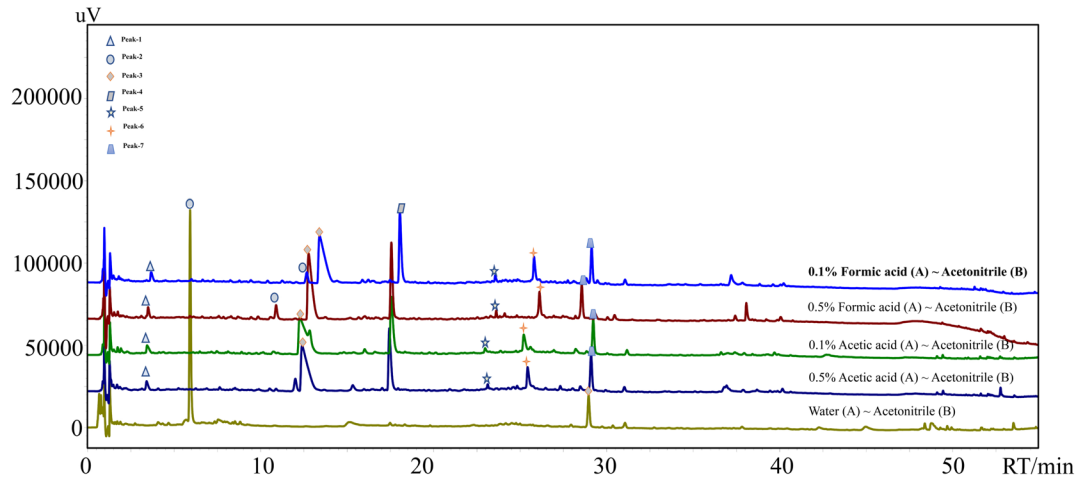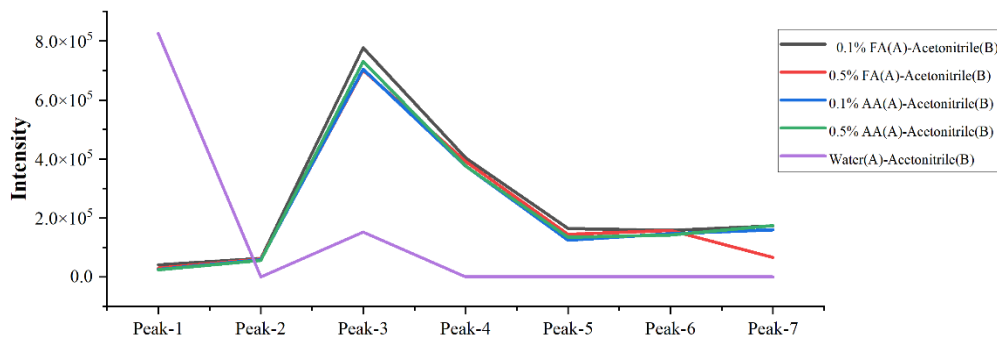

**Figure S4**



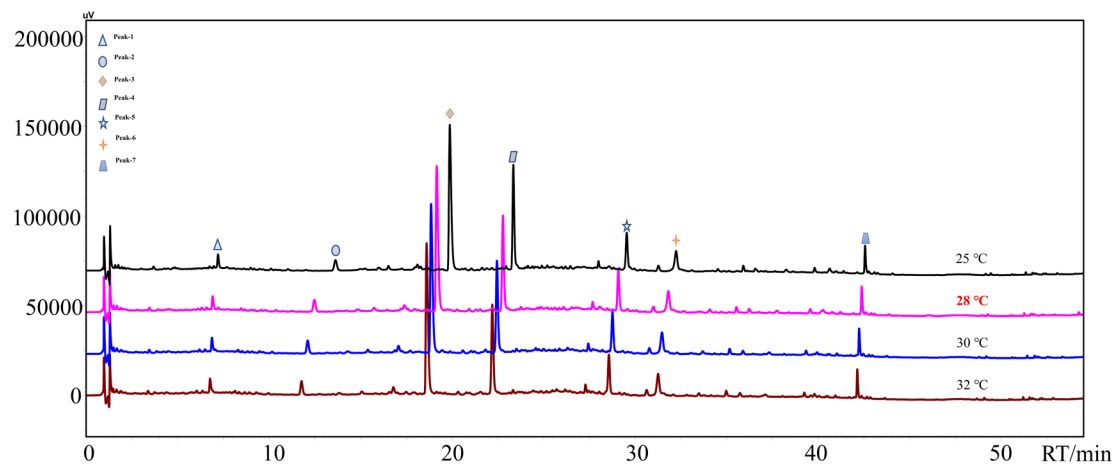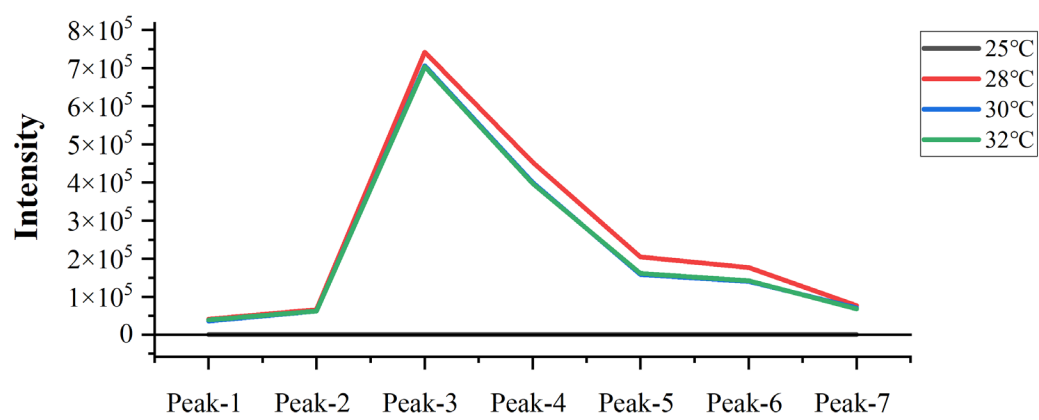

Figure S5

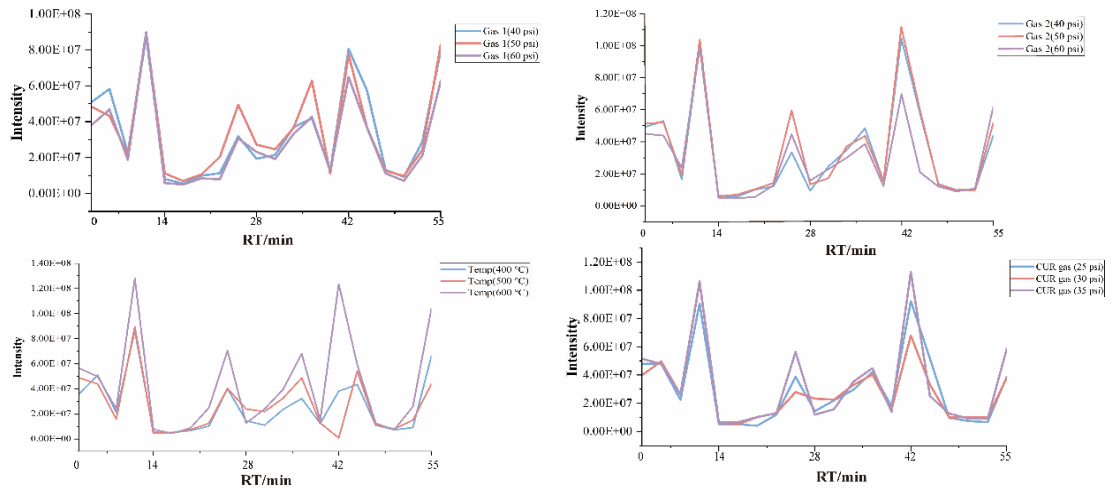

Figure S6

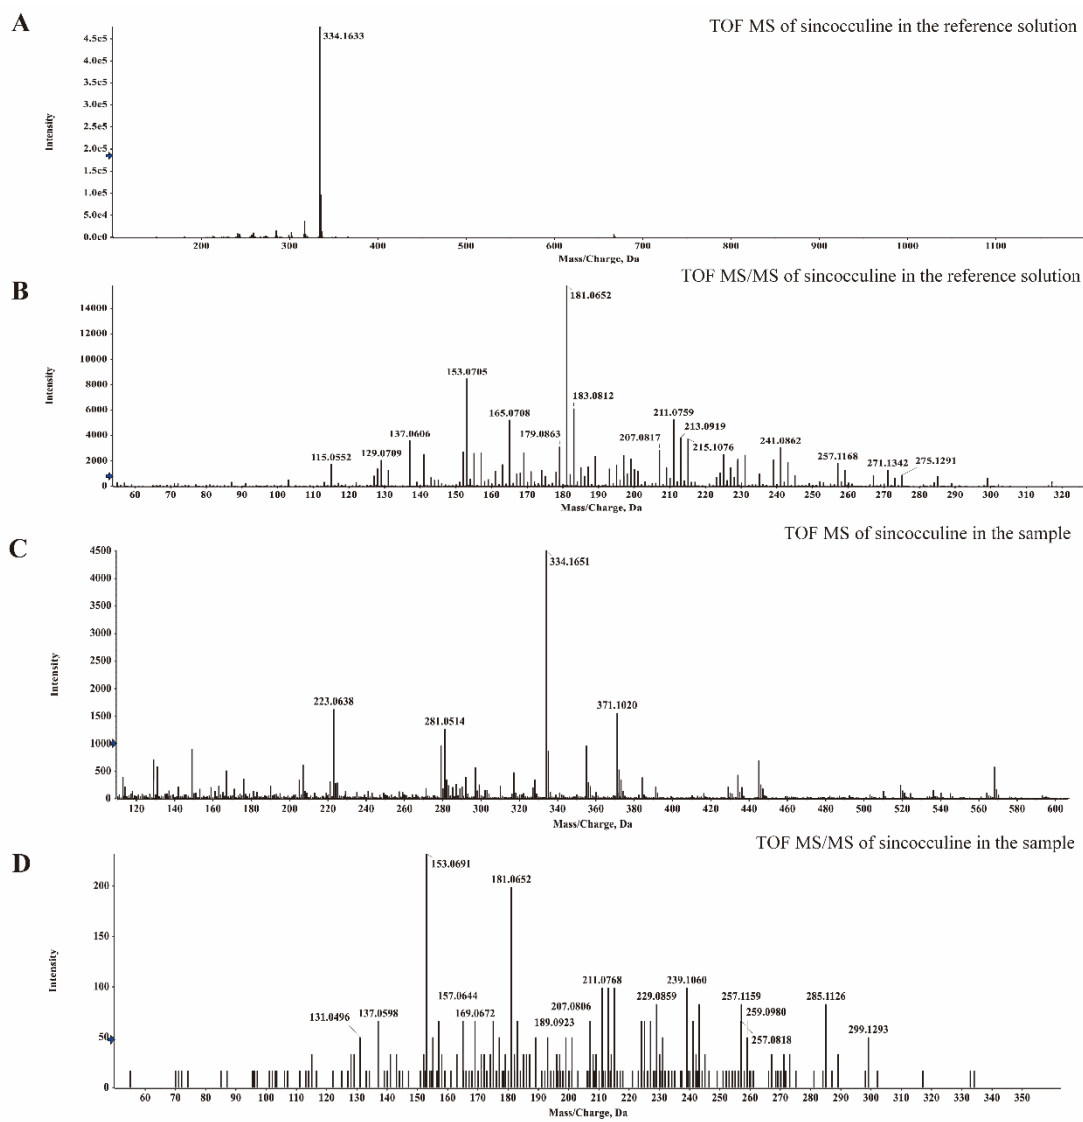

**Figure. S7**

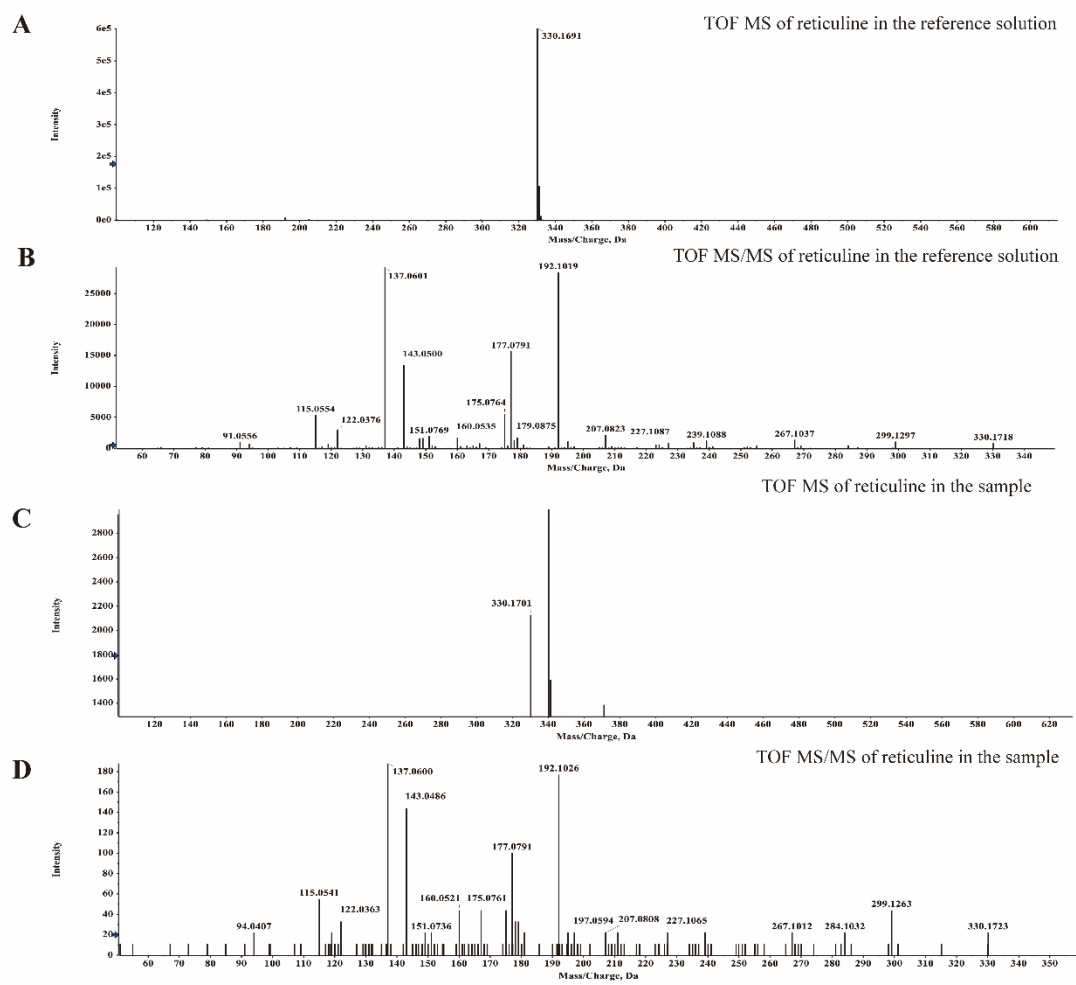

**Figure. S8**

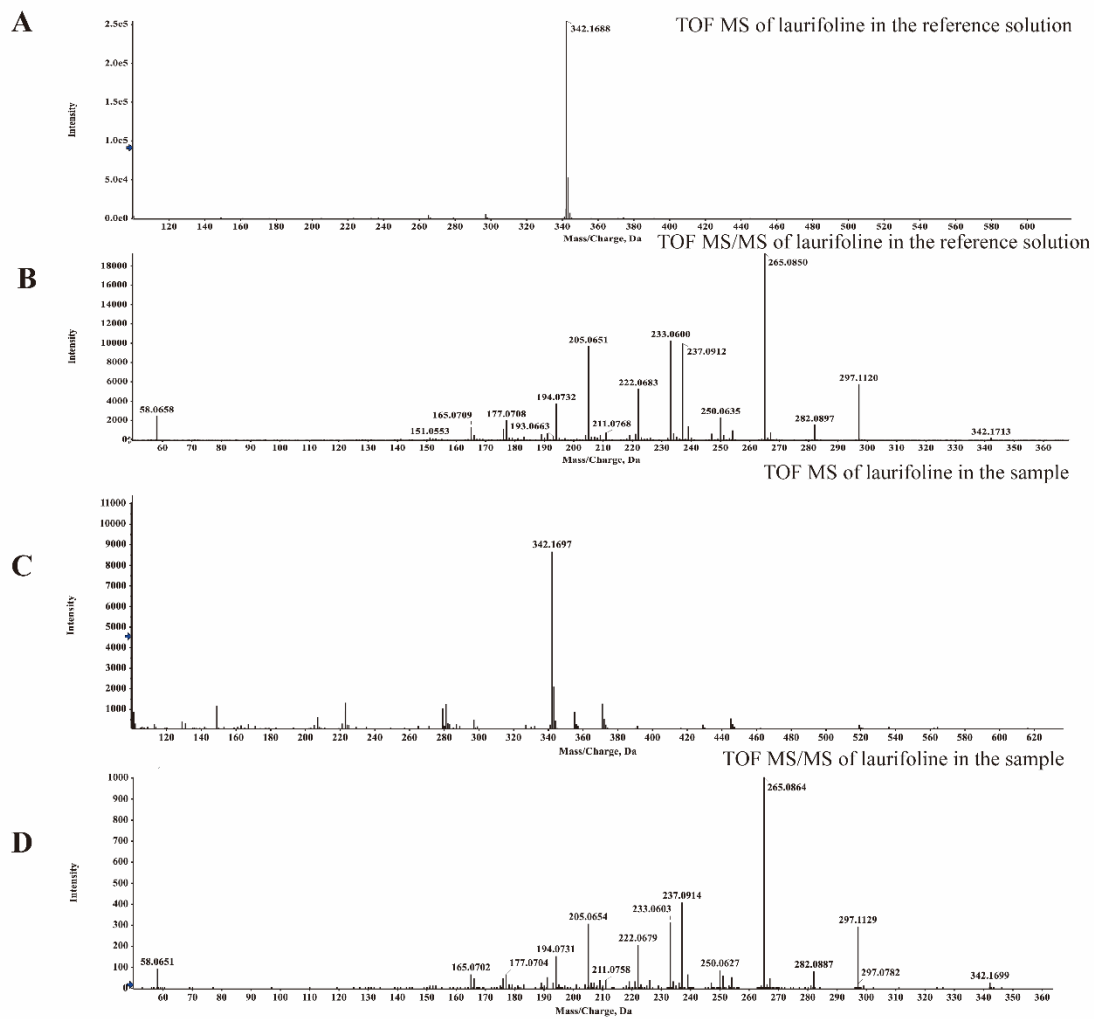

**Figure. S9**

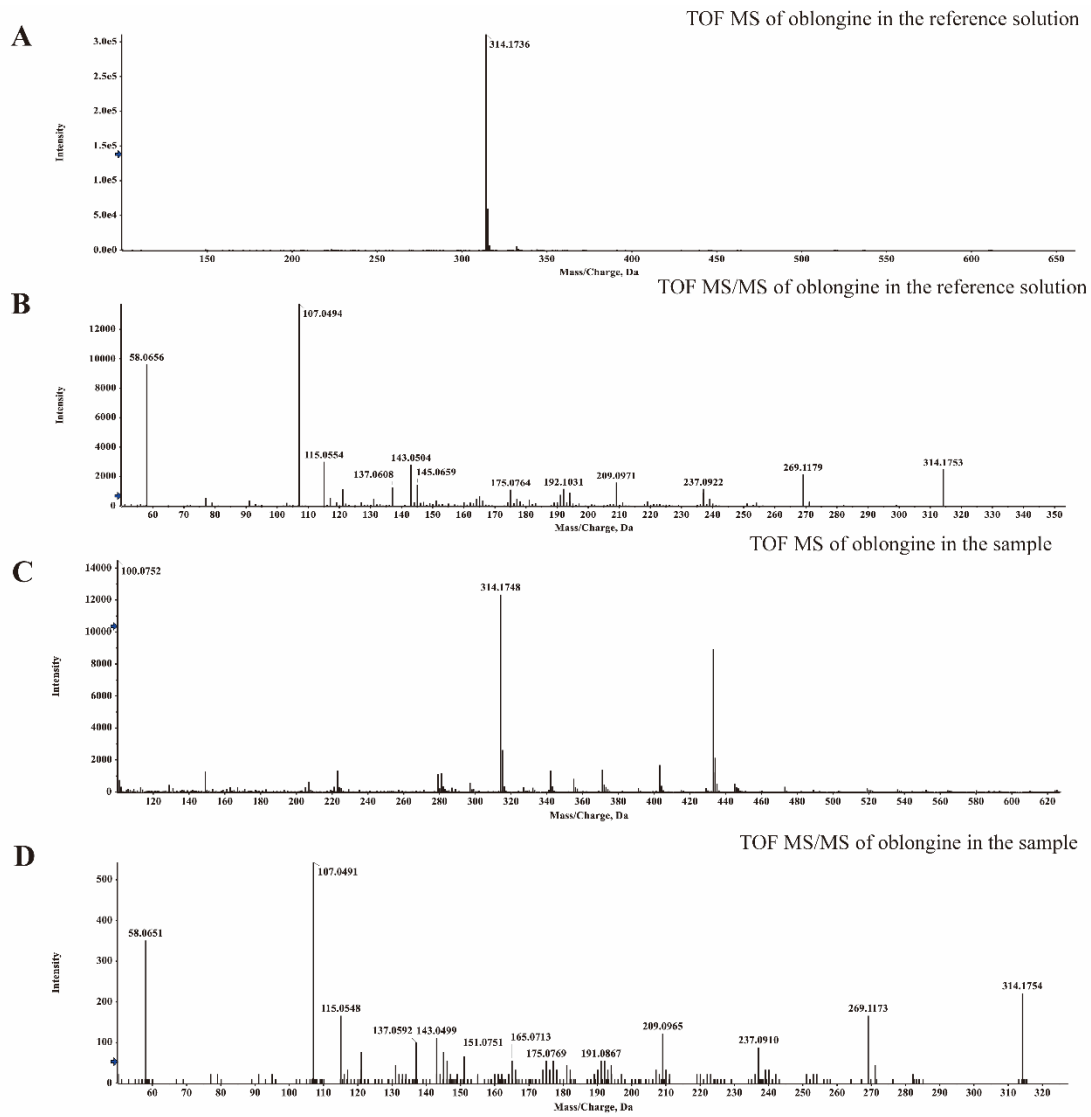

Figure. S10

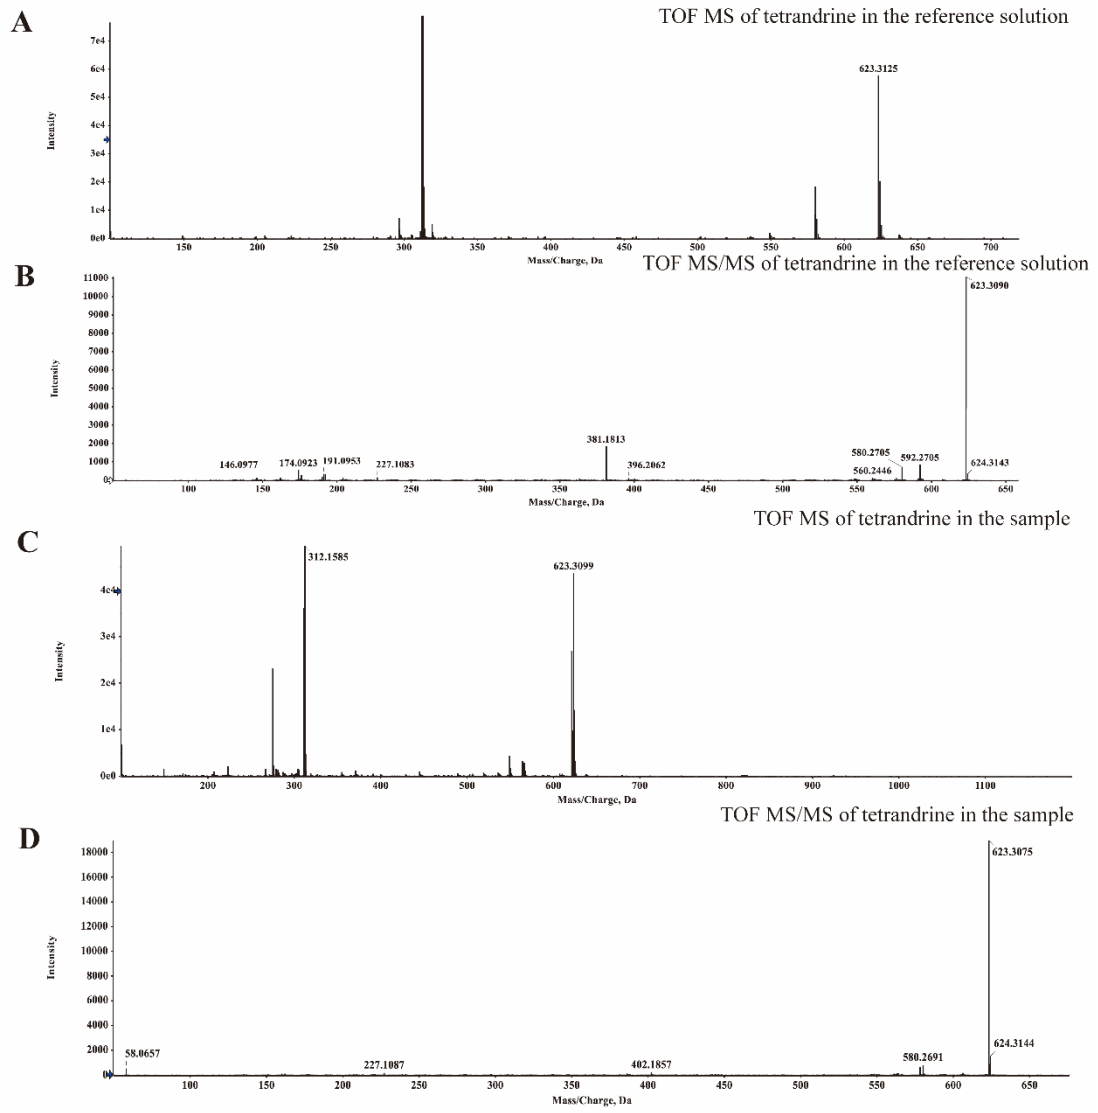

Figure. S11

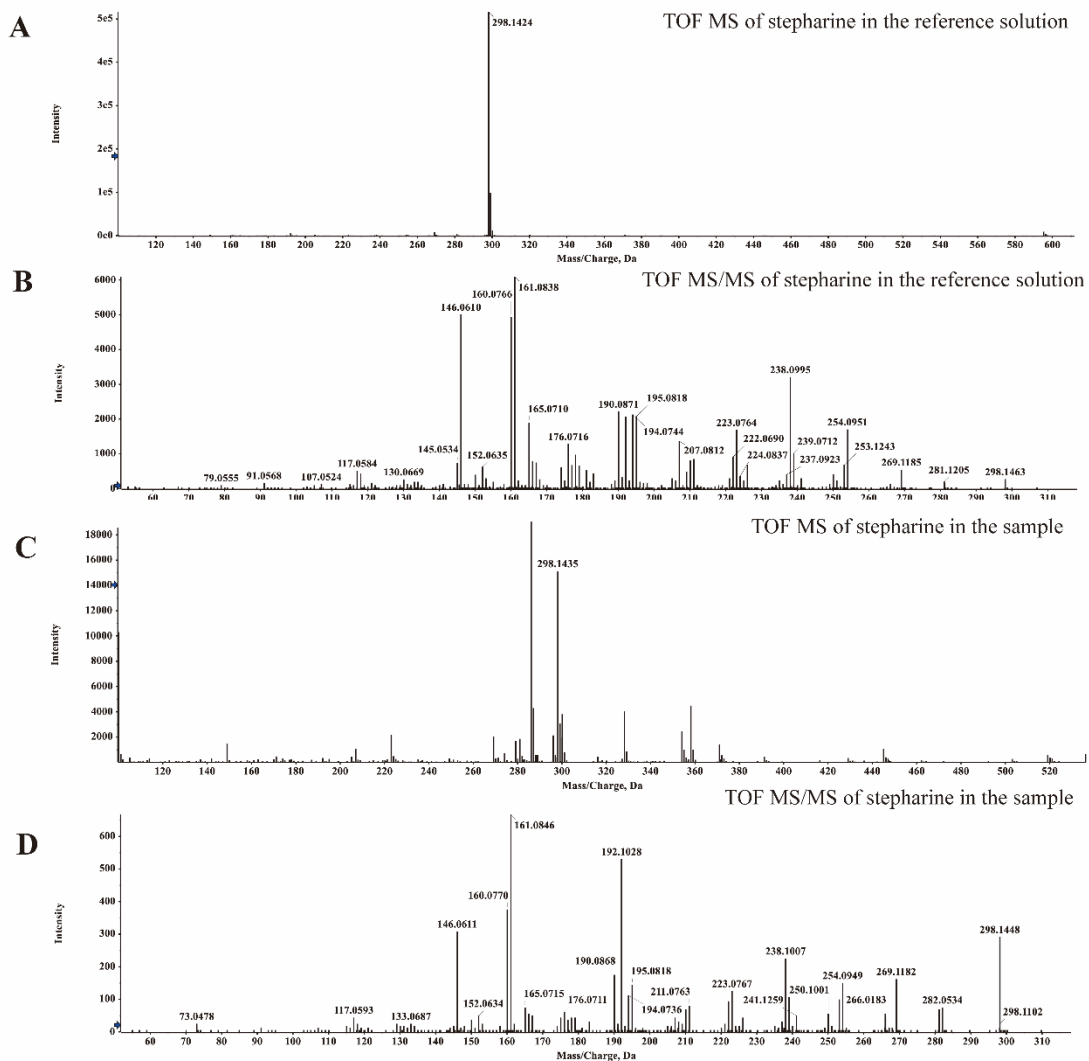

Figure. S12



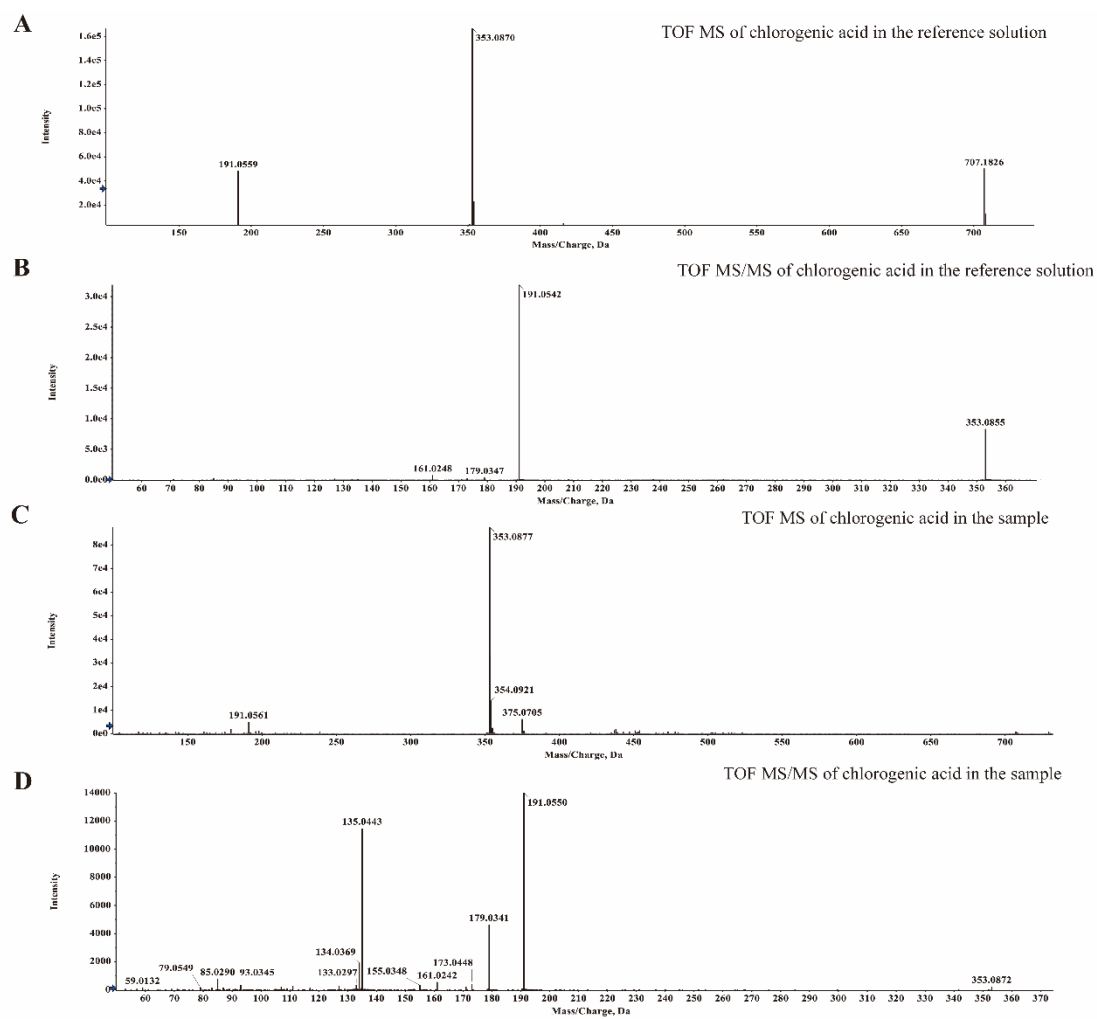

Figure. S13

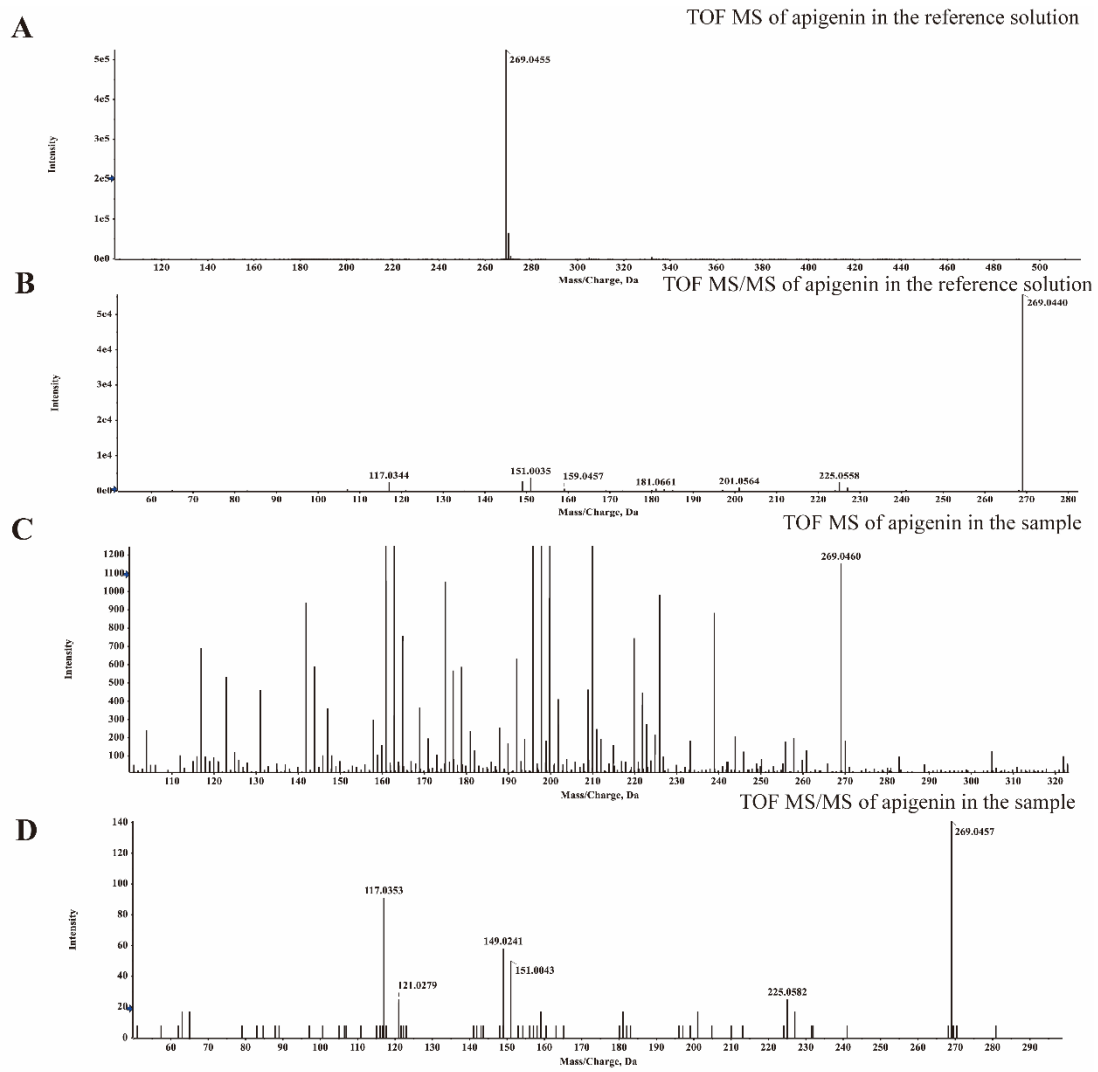

**Figure. S14**

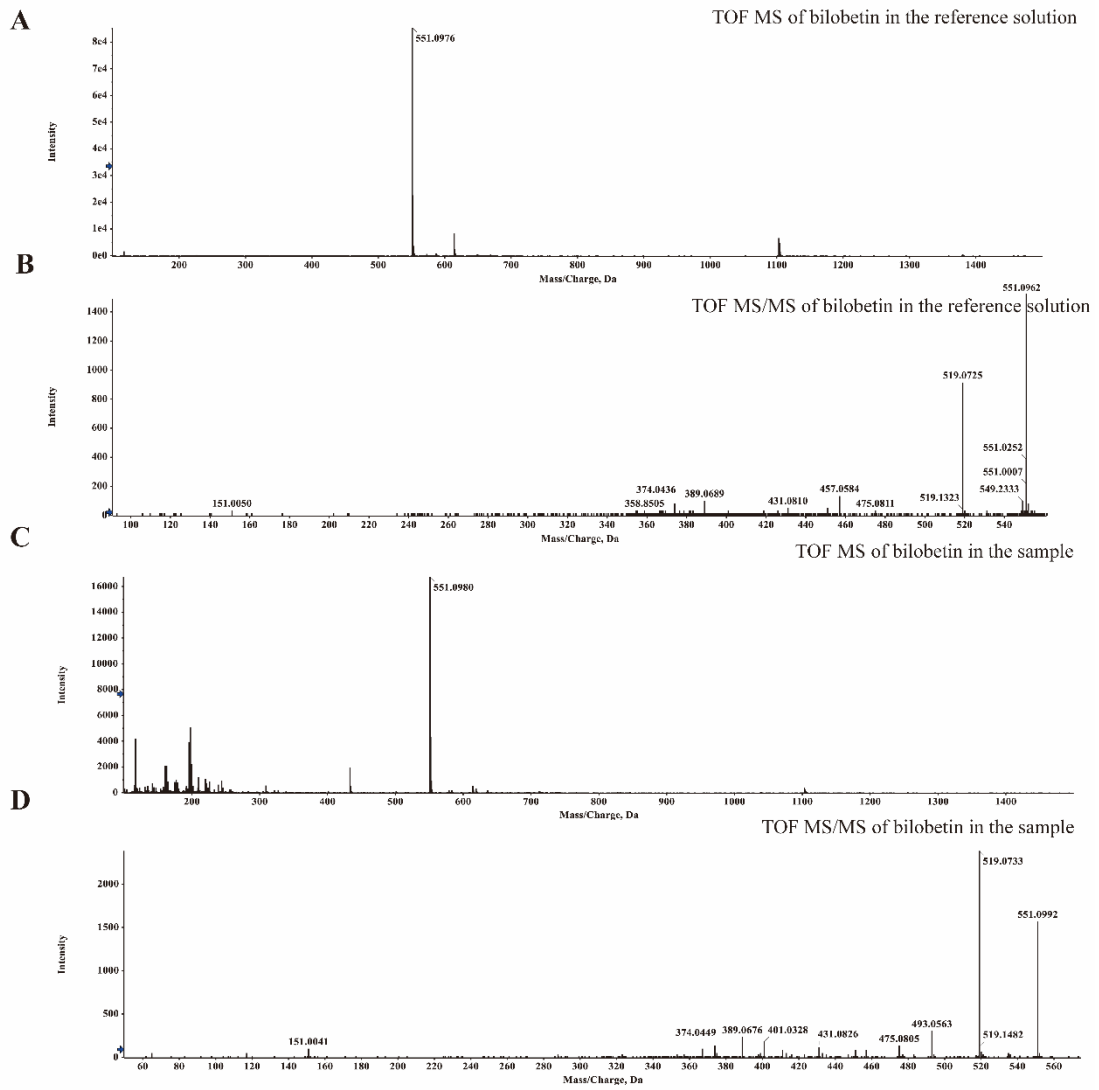

**Figure. S15**

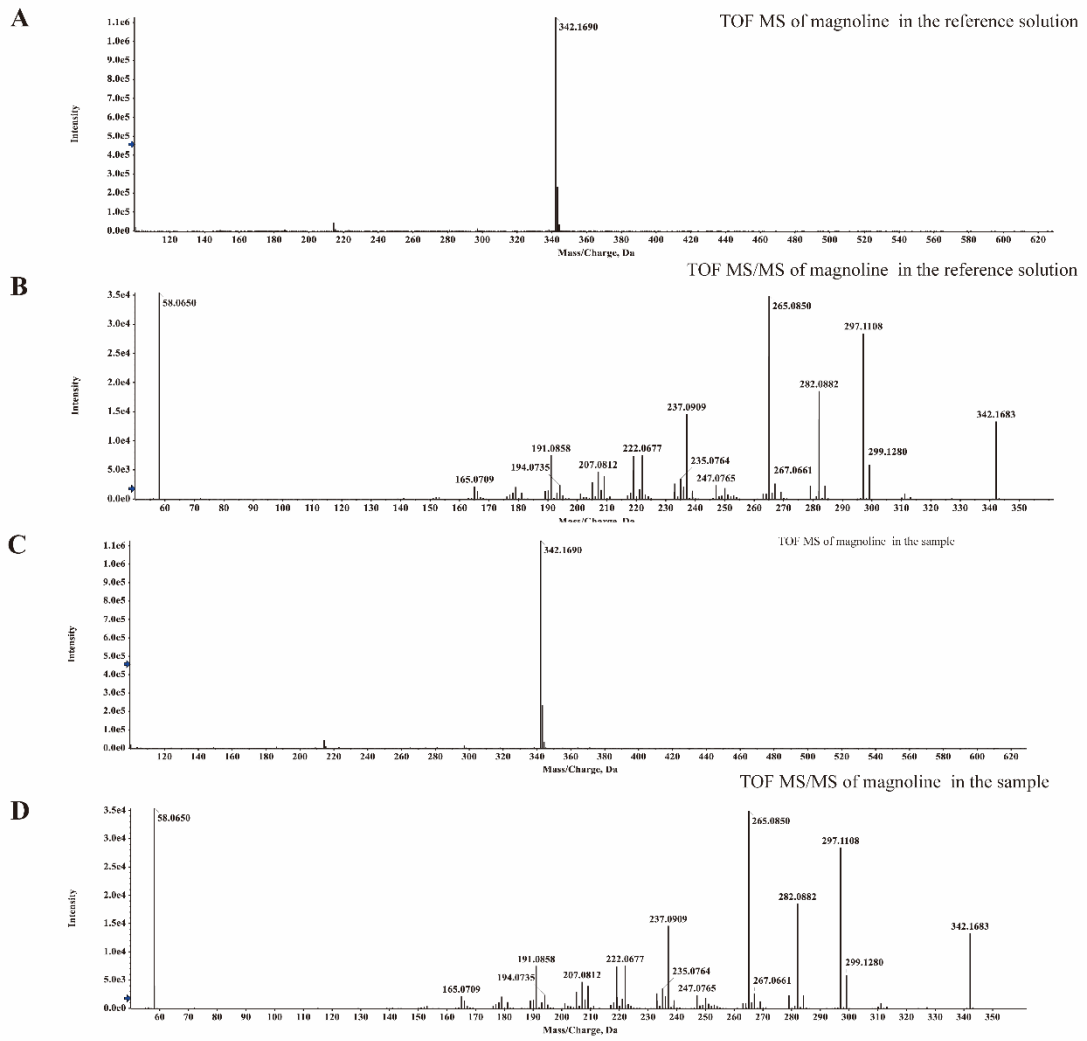

**Figure. S16**

**Table S1**

| No. | Sample batch  | Sampling site | No. | Sample batch  | Sampling site |
|-----|---------------|---------------|-----|---------------|---------------|
| S1  | GZ-202212202  | A             | S47 | GZ-20230623-7 | B             |
| S2  | GZ-20230305-1 | A             | S48 | GZ-20230906-1 | C             |
| S3  | GZ-20230305-2 | A             | S49 | GZ-20230906-2 | C             |
| S4  | GZ-20230305-3 | A             | S50 | GZ-20230906-3 | C             |
| S5  | GZ-20230305-4 | A             | S51 | GZ-20230906-4 | C             |
| S6  | GZ-20230512-1 | B             | S52 | GZ-20230906-5 | D             |
| S7  | GZ-20230512-2 | B             | S53 | GZ-20230906-6 | D             |
| S8  | GZ-20230512-3 | B             | S54 | GZ-20230906-7 | D             |
| S9  | GZ-20230512-4 | B             | S55 | GZ-20230906-8 | C             |
| S10 | GZ-20230512-5 | B             | S56 | GZ-20230906-9 | C             |
| S11 | GZ-20230623-1 | B             | S57 | GZ-20230909-1 | E             |
| S12 | GZ-20230623-2 | B             | S58 | GZ-20230909-2 | E             |
| S13 | GZ-20230623-3 | B             | S59 | GZ-20230909-3 | E             |
| S14 | GZ-20230623-4 | B             | S60 | GZ-20230909-4 | E             |
| S15 | GZ-20230623-5 | B             | S61 | GZ-20230909-5 | E             |
| S16 | GZ-20230623-6 | B             | S62 | GZ-20230512-1 | B             |
| S17 | GZ-20230623-7 | B             | S63 | GZ-20230512-2 | B             |
| S18 | GZ-20230906-1 | C             | S64 | GZ-20230512-3 | B             |
| S19 | GZ-20230906-2 | C             | S65 | GZ-20230512-4 | B             |
| S20 | GZ-20230906-3 | C             | S66 | GZ-20230512-5 | B             |

|     |               |   |     |                 |   |
|-----|---------------|---|-----|-----------------|---|
| S21 | GZ-20230906-4 | C | S67 | GZ-20230623-1   | B |
| S22 | GZ-20230906-5 | D | S68 | GZ-20230623-2   | B |
| S23 | GZ-20230906-6 | D | S69 | GZ-20230623-3   | B |
| S24 | GZ-20230906-7 | D | S70 | GZ-20230623-4   | B |
| S25 | GZ-20230906-8 | C | S71 | GZ-20230623-5   | B |
| S26 | GZ-20230906-9 | C | S72 | GZ-20230623-6   | B |
| S27 | GZ-20230909-1 | E | S73 | GZ-20230623-7   | B |
| S28 | GZ-20230909-2 | E | S74 | GZ-20230906-1   | C |
| S29 | GZ-20230909-3 | E | S75 | GZ-20230906-2   | C |
| S30 | GZ-20230909-4 | E | S76 | GZ-20230906-3   | C |
| S31 | GZ-202212202  | A | S77 | GZ-20230906-4   | C |
| S32 | GZ-20230305-1 | A | S78 | GZ-20230906-5   | D |
| S33 | GZ-20230305-2 | A | S79 | GZ-20230906-6   | D |
| S34 | GZ-20230305-3 | A | S80 | GZ-20230906-7   | D |
| S35 | GZ-20230305-4 | B | S81 | GZ-20230906-8   | C |
| S36 | GZ-20230512-1 | B | S82 | GZ-20230906-9   | C |
| S37 | GZ-20230512-2 | B | S83 | GZ-20230909-1   | E |
| S38 | GZ-20230512-3 | B | S84 | GZ-20230909-2   | E |
| S39 | GZ-20230512-4 | B | S85 | GZ-20230909-3   | E |
| S40 | GZ-20230512-5 | B | S86 | GZ-20230909-3-1 | E |
| S41 | GZ-20230623-1 | B | S87 | GZ-20230909-3-2 | E |
| S42 | GZ-20230623-2 | B | S88 | GZ-20230909-3-3 | E |

|     |               |   |     |                 |   |
|-----|---------------|---|-----|-----------------|---|
| S43 | GZ-20230623-3 | B | S89 | GZ-20230909-3-1 | E |
| S44 | GZ-20230623-4 | B | S90 | GZ-20230909-3-2 | E |
| S45 | GZ-20230623-5 | B | S91 | GZ-20230909-3-3 | E |
| S46 | GZ-20230623-6 | B |     |                 |   |

Note: A: Guiyang Xintian Pharmaceutical Co., Ltd.; B: Qianxi City, Bijie City, Guizhou Province ; C: Honghuagang District, Zunyi City, Guizhou Province; D: Meitan County, Zunyi City, Guizhou Province; E: Huichuan District, Zunyi City, Guizhou Province.

**Table S2**

| Standards           | Formula              | Lot No.  | CAS No.     | Purity   | Manufacturer |
|---------------------|----------------------|----------|-------------|----------|--------------|
| Magnoflorine        | $C_{20}H_{24}NO_4^+$ | 808F021  | 8841-09-5   | HPLC>98% | A            |
| Sinococuline        | $C_{18}H_{23}NO_5$   | BBP06007 | 109351-36-2 | HPLC>98% | B            |
| Tetrandrine         | $C_{38}H_{42}N_2O_6$ | BBP03852 | 518-34-3    | HPLC>98% | B            |
| Laurifoline         | $C_{20}H_{24}NO_4$   | BBP01501 | 7224-61-5   | HPLC>98% | B            |
| Stepharine          | $C_{18}H_{19}NO_3$   | BBP06021 | 2810-21-1   | HPLC>98% | B            |
| Reticuline          | $C_{19}H_{23}NO_4$   | BBP01159 | 485-19-8    | HPLC>98% | B            |
| Oblongine           | $C_{19}H_{24}NO_3^+$ | BBP01570 | 60008-01-7  | HPLC>98% | B            |
| Chlorogenic<br>acid | $C_{16}H_{18}O_9$    | BBP03169 | 327-97-9    | HPLC>98% | B            |
| Bilobetin           | $C_{31}H_{20}O_{10}$ | BBP02192 | 521-32-4    | HPLC>98% | B            |
| Apigenin            | $C_{15}H_{10}O_5$    | BBP00357 | 520-36-5    | HPLC>98% | B            |

Note: A: Beijing Solarbio Science & Technology Co., Ltd.; B: BioBioPha Co., Ltd.



Table 3

| No. | Compound                                                  | Formula                                                       | Molecular weight | No. | compound                                                                                          | formula                                         | molecular weight |
|-----|-----------------------------------------------------------|---------------------------------------------------------------|------------------|-----|---------------------------------------------------------------------------------------------------|-------------------------------------------------|------------------|
| 1   | kohatine                                                  | C <sub>34</sub> H <sub>32</sub> N <sub>2</sub> O <sub>6</sub> | 564.2252         | 130 | jamtine- <i>N</i> -oxide                                                                          | C <sub>20</sub> H <sub>25</sub> NO <sub>5</sub> | 359.1726         |
| 2   | 2- <i>N</i> -methylkohatine                               | C <sub>35</sub> H <sub>32</sub> N <sub>2</sub> O <sub>6</sub> | 576.2252         | 131 | laurifinine                                                                                       | C <sub>20</sub> H <sub>25</sub> NO <sub>3</sub> | 327.1828         |
| 3   | 5'-hydroxyapateline                                       | C <sub>34</sub> H <sub>32</sub> N <sub>2</sub> O <sub>6</sub> | 564.2252         | 132 | hirsutine                                                                                         | C <sub>19</sub> H <sub>23</sub> NO <sub>4</sub> | 329.1621         |
| 4   | puertogaline B                                            | C <sub>35</sub> H <sub>32</sub> N <sub>2</sub> O <sub>6</sub> | 576.2252         | 133 | cohirsitinine                                                                                     | C <sub>18</sub> H <sub>23</sub> NO <sub>3</sub> | 301.1672         |
| 5   | $\alpha,\alpha'$ -dioxo-7'- <i>O</i> -demethylstebisimine | C <sub>35</sub> H <sub>28</sub> N <sub>2</sub> O <sub>8</sub> | 604.1838         | 134 | coclafine                                                                                         | C <sub>16</sub> H <sub>19</sub> NO <sub>2</sub> | 257.1411         |
| 6   | tliafunimine                                              | C <sub>36</sub> H <sub>36</sub> N <sub>2</sub> O <sub>6</sub> | 592.2564         | 135 | isocorydine                                                                                       | C <sub>21</sub> H <sub>26</sub> NO <sub>4</sub> | 356.1855         |
| 7   | demethylstebisimine                                       | C <sub>36</sub> H <sub>36</sub> N <sub>2</sub> O <sub>6</sub> | 592.2564         | 136 | bavachinin                                                                                        | C <sub>21</sub> H <sub>22</sub> O <sub>4</sub>  | 339.1465         |
| 8   | (+)-norberbamine                                          | C <sub>36</sub> H <sub>38</sub> N <sub>2</sub> O <sub>6</sub> | 594.272          | 137 | Isoxanthohumol                                                                                    | C <sub>21</sub> H <sub>22</sub> O <sub>5</sub>  | 354.1461         |
| 9   | coclobine                                                 | C <sub>37</sub> H <sub>38</sub> N <sub>2</sub> O <sub>6</sub> | 606.272          | 138 | leachianone G                                                                                     | C <sub>20</sub> H <sub>20</sub> O <sub>6</sub>  | 356.1254         |
| 10  | cheratamine                                               | C <sub>36</sub> H <sub>34</sub> N <sub>2</sub> O <sub>7</sub> | 606.2357         | 139 | pinnatifinoside I                                                                                 | C <sub>24</sub> H <sub>22</sub> O <sub>10</sub> | 470.1206         |
| 11  | cocsuline- <i>N</i> -2-oxide                              | C <sub>36</sub> H <sub>34</sub> N <sub>2</sub> O <sub>6</sub> | 590.2408         | 140 | isobavachin                                                                                       | C <sub>20</sub> H <sub>20</sub> O <sub>4</sub>  | 324.1356         |
| 12  | isotrilobone- <i>N</i> -2-oxide                           | C <sub>36</sub> H <sub>36</sub> N <sub>2</sub> O <sub>6</sub> | 592.2564         | 141 | lupinifolin                                                                                       | C <sub>25</sub> H <sub>26</sub> O <sub>5</sub>  | 406.1773         |
| 13  | <i>O</i> -methylthalmethine                               | C <sub>37</sub> H <sub>38</sub> N <sub>2</sub> O <sub>6</sub> | 606.272          | 142 | norkurainol                                                                                       | C <sub>25</sub> H <sub>28</sub> O <sub>7</sub>  | 440.1827         |
| 14  | punjabine                                                 | C <sub>35</sub> H <sub>32</sub> N <sub>2</sub> O <sub>7</sub> | 592.2201         | 143 | sanggenon H                                                                                       | C <sub>20</sub> H <sub>18</sub> O <sub>6</sub>  | 354.1098         |
| 15  | wattisine A                                               | C <sub>36</sub> H <sub>38</sub> N <sub>2</sub> O <sub>6</sub> | 594.272          | 144 | kushenol B                                                                                        | C <sub>30</sub> H <sub>36</sub> O <sub>6</sub>  | 492.2502         |
| 16  | stebisimine                                               | C <sub>36</sub> H <sub>34</sub> N <sub>2</sub> O <sub>6</sub> | 590.2408         | 145 | 5,7,8,2'-tetrahydroxy-flavone-7- <i>O</i> - $\beta$ - <i>D</i> -glucoside                         | C <sub>21</sub> H <sub>20</sub> O <sub>11</sub> | 448.0999         |
| 17  | siddiquamine                                              | C <sub>35</sub> H <sub>30</sub> N <sub>2</sub> O <sub>6</sub> | 608.2876         | 146 | (2 <i>S</i> )-5,7-dihydroxy-6-methoxy-flavanone-7- <i>O</i> - $\beta$ - <i>D</i> -glucopyranoside | C <sub>22</sub> H <sub>24</sub> O <sub>10</sub> | 448.1362         |
| 18  | 1,2-dehydrokohatine                                       | C <sub>32</sub> H <sub>30</sub> N <sub>2</sub> O <sub>6</sub> | 608.2876         | 147 | liquiritigenin-4' - <i>O</i> - $\beta$ - <i>D</i> -glucopyranoside                                | C <sub>21</sub> H <sub>22</sub> O <sub>9</sub>  | 418.1257         |

|    |                                          |                                                               |          |     |                                                                             |                                                 |          |
|----|------------------------------------------|---------------------------------------------------------------|----------|-----|-----------------------------------------------------------------------------|-------------------------------------------------|----------|
| 19 | apateline                                | C <sub>34</sub> H <sub>32</sub> N <sub>2</sub> O <sub>5</sub> | 548.2303 | 148 | liquiritin                                                                  | C <sub>21</sub> H <sub>22</sub> O <sub>9</sub>  | 418.1257 |
| 20 | cocsoline                                | C <sub>34</sub> H <sub>32</sub> N <sub>2</sub> O <sub>5</sub> | 548.2303 | 149 | hispidulin7-(6- <i>E-p</i> -coumaroyl- $\beta$ - <i>D</i> -glucopyranoside) | C <sub>31</sub> H <sub>28</sub> O <sub>13</sub> | 608.1521 |
| 21 | hydroxyisotrilobine                      | C <sub>36</sub> H <sub>36</sub> N <sub>2</sub> O <sub>6</sub> | 592.2564 | 150 | 7,4',7'',4'''-tetra- <i>O</i> -amentoflavone                                | C <sub>34</sub> H <sub>26</sub> O <sub>10</sub> | 594.1518 |
| 22 | kurramine                                | C <sub>33</sub> H <sub>28</sub> N <sub>2</sub> O <sub>5</sub> | 532.1991 | 151 | sanggenon G                                                                 | C <sub>40</sub> H <sub>38</sub> O <sub>11</sub> | 694.2403 |
| 23 | (+)-cocsuline                            | C <sub>35</sub> H <sub>34</sub> N <sub>2</sub> O <sub>5</sub> | 562.2459 | 152 | gardenin C                                                                  | C <sub>20</sub> H <sub>22</sub> O <sub>9</sub>  | 406.1257 |
| 24 | N-methylapateline                        | C <sub>35</sub> H <sub>34</sub> N <sub>2</sub> O <sub>5</sub> | 562.2459 | 153 | flavone                                                                     | C <sub>15</sub> H <sub>10</sub> O <sub>2</sub>  | 222.0678 |
| 25 | (+)-kohatamine                           | C <sub>35</sub> H <sub>34</sub> N <sub>2</sub> O <sub>6</sub> | 578.2408 | 154 | isosakuranetin                                                              | C <sub>16</sub> H <sub>14</sub> O <sub>5</sub>  | 286.0837 |
| 26 | kurramine-2'- $\alpha$ - <i>N</i> -oxide | C <sub>33</sub> H <sub>28</sub> N <sub>2</sub> O <sub>6</sub> | 548.194  | 155 | 5,7,8,3',4'-pentamethoxyflavone                                             | C <sub>20</sub> H <sub>20</sub> O <sub>7</sub>  | 372.1203 |
| 27 | kurramine-2'- $\beta$ - <i>N</i> -oxide  | C <sub>33</sub> H <sub>28</sub> N <sub>2</sub> O <sub>6</sub> | 548.194  | 156 | flavonol                                                                    | C <sub>15</sub> H <sub>10</sub> O <sub>3</sub>  | 238.0627 |
| 28 | (+)-coccuorbiculatine A                  | C <sub>38</sub> H <sub>42</sub> N <sub>2</sub> O <sub>6</sub> | 622.3032 | 157 | quercetin                                                                   | C <sub>15</sub> H <sub>10</sub> O <sub>7</sub>  | 302.0423 |
| 29 | (+)- <i>O</i> -methylcocsoline           | C <sub>35</sub> H <sub>34</sub> N <sub>2</sub> O <sub>5</sub> | 562.2459 | 158 | kushenol G                                                                  | C <sub>25</sub> H <sub>28</sub> O <sub>8</sub>  | 456.1776 |
| 30 | oxyacanthine                             | C <sub>37</sub> H <sub>40</sub> N <sub>2</sub> O <sub>6</sub> | 608.2876 | 159 | patuletin-7- <i>O</i> -[6'- <i>O</i> -(2-methylbutyryl)]-glucoside          | C <sub>27</sub> H <sub>30</sub> O <sub>14</sub> | 578.1626 |
| 31 | trilobamine                              | C <sub>35</sub> H <sub>36</sub> N <sub>2</sub> O <sub>6</sub> | 580.2564 | 160 | kaempferol-3- <i>O</i> -neohesperidoside                                    | C <sub>27</sub> H <sub>30</sub> O <sub>15</sub> | 594.1575 |
| 32 | (+)-siddiquine                           | C <sub>34</sub> H <sub>28</sub> N <sub>2</sub> O <sub>6</sub> | 560.194  | 161 | quercetin-7- <i>O</i> -rutinoside                                           | C <sub>27</sub> H <sub>30</sub> O <sub>16</sub> | 610.1524 |
| 33 | cocsupendine                             | C <sub>36</sub> H <sub>34</sub> N <sub>2</sub> O <sub>6</sub> | 590.2408 | 162 | sagittatoside B                                                             | C <sub>32</sub> H <sub>38</sub> O <sub>14</sub> | 646.225  |
| 34 | normenisarine                            | C <sub>34</sub> H <sub>32</sub> N <sub>2</sub> O <sub>5</sub> | 548.2303 | 163 | kaempferol-3- <i>O</i> -lathyroside(Nikotoflorin)                           | C <sub>26</sub> H <sub>28</sub> O <sub>15</sub> | 580.1419 |
| 35 | menisarine                               | C <sub>36</sub> H <sub>34</sub> N <sub>2</sub> O <sub>6</sub> | 590.2408 | 164 | rutin                                                                       | C <sub>27</sub> H <sub>30</sub> O <sub>16</sub> | 610.1524 |
| 36 | tetrandrine                              | C <sub>38</sub> H <sub>42</sub> N <sub>2</sub> O <sub>5</sub> | 606.3083 | 165 | baohuoside I                                                                | C <sub>27</sub> H <sub>30</sub> O <sub>10</sub> | 514.183  |
| 37 | norpenduline                             | C <sub>36</sub> H <sub>38</sub> N <sub>2</sub> O <sub>6</sub> | 594.272  | 166 | ermanin                                                                     | C <sub>17</sub> H <sub>14</sub> O <sub>6</sub>  | 314.0786 |
| 38 | hernandezine                             | C <sub>39</sub> H <sub>44</sub> N <sub>2</sub> O <sub>7</sub> | 652.3137 | 167 | kaempferol                                                                  | C <sub>15</sub> H <sub>10</sub> O <sub>6</sub>  | 286.0474 |

|    |                                              |                                                               |          |     |                                                           |                                                 |          |
|----|----------------------------------------------|---------------------------------------------------------------|----------|-----|-----------------------------------------------------------|-------------------------------------------------|----------|
| 39 | penduline                                    | C <sub>37</sub> H <sub>40</sub> N <sub>2</sub> O <sub>6</sub> | 608.2876 | 168 | ombuin-3- <i>O</i> -β- <i>D</i> -glucoside                | C <sub>23</sub> H <sub>24</sub> O <sub>12</sub> | 492.126  |
| 40 | (+)-1,2-dehydro-2'-nortelobine               | C <sub>34</sub> H <sub>30</sub> N <sub>2</sub> O <sub>5</sub> | 546.2147 | 169 | kaempferide-4' -methylether-3-glucoside                   | C <sub>22</sub> H <sub>22</sub> O <sub>11</sub> | 462.1155 |
| 41 | <i>O,O</i> -dimethy-1',2'-dehydronorkohatine | C <sub>35</sub> H <sub>32</sub> N <sub>2</sub> O <sub>6</sub> | 576.2252 | 170 | isorhamnetin-3- <i>O</i> -β- <i>D</i> -galactoside        | C <sub>22</sub> H <sub>22</sub> O <sub>12</sub> | 478.1104 |
| 42 | 1,2-dehydroapateline                         | C <sub>34</sub> H <sub>30</sub> N <sub>2</sub> O <sub>5</sub> | 546.2147 | 171 | kaempferol-3-glucuronide                                  | C <sub>21</sub> H <sub>18</sub> O <sub>12</sub> | 462.0792 |
| 43 | orbiculatinine                               | C <sub>34</sub> H <sub>30</sub> N <sub>2</sub> O <sub>6</sub> | 562.2096 | 172 | trifolin                                                  | C <sub>21</sub> H <sub>20</sub> O <sub>11</sub> | 448.0999 |
| 44 | 1,2-dehydrokohatamine                        | C <sub>35</sub> H <sub>32</sub> N <sub>2</sub> O <sub>6</sub> | 576.2252 | 173 | 2,5-dimethyl-7-hydroxychromone                            | C <sub>11</sub> H <sub>10</sub> O <sub>3</sub>  | 190.0627 |
| 45 | dehydrokohatine                              | C <sub>34</sub> H <sub>30</sub> N <sub>2</sub> O <sub>6</sub> | 562.2096 | 174 | 5- <i>O</i> -methylvisamminol                             | C <sub>16</sub> H <sub>18</sub> O <sub>5</sub>  | 290.1149 |
| 46 | 1,2-dehydro-2'-nortelobine                   | C <sub>34</sub> H <sub>30</sub> N <sub>2</sub> O <sub>5</sub> | 546.2147 | 175 | ledebouriellol                                            | C <sub>20</sub> H <sub>22</sub> O <sub>7</sub>  | 374.1359 |
| 47 | <i>N</i> -norcocsulinin                      | C <sub>34</sub> H <sub>32</sub> N <sub>2</sub> O <sub>6</sub> | 564.2252 | 176 | 1,5-dihydrxy-2,3,4,7-tetramethoxyxanthone                 | C <sub>17</sub> H <sub>16</sub> O <sub>8</sub>  | 348.084  |
| 48 | cocsilinine                                  | C <sub>33</sub> H <sub>30</sub> N <sub>2</sub> O <sub>6</sub> | 550.2096 | 177 | 2''- <i>O</i> -feruloylaloetin                            | C <sub>29</sub> H <sub>30</sub> O <sub>12</sub> | 570.1728 |
| 49 | <i>O</i> -methylcocsulinine                  | C <sub>36</sub> H <sub>36</sub> N <sub>2</sub> O <sub>6</sub> | 592.2564 | 178 | aloeresin                                                 | C <sub>19</sub> H <sub>22</sub> O <sub>9</sub>  | 394.1257 |
| 50 | cocsiline                                    | C <sub>35</sub> H <sub>34</sub> N <sub>2</sub> O <sub>6</sub> | 578.2408 | 179 | prim- <i>O</i> -glucosylcimifugin                         | C <sub>22</sub> H <sub>28</sub> O <sub>11</sub> | 468.1623 |
| 51 | cocsulinine                                  | C <sub>35</sub> H <sub>34</sub> N <sub>2</sub> O <sub>6</sub> | 578.2408 | 180 | sec- <i>O</i> -glucosylhamaudol                           | C <sub>21</sub> H <sub>26</sub> O <sub>10</sub> | 438.1518 |
| 52 | pendulinine                                  | C <sub>35</sub> H <sub>34</sub> N <sub>2</sub> O <sub>6</sub> | 578.2408 | 181 | aloeresin G                                               | C <sub>29</sub> H <sub>30</sub> O <sub>10</sub> | 538.183  |
| 53 | pendilinine                                  | C <sub>36</sub> H <sub>36</sub> N <sub>2</sub> O <sub>6</sub> | 592.2564 | 182 | 6-methoxy-2-[2-(3'-methoxyphenyl)ethyl]chromone           | C <sub>19</sub> H <sub>18</sub> O <sub>4</sub>  | 310.12   |
| 54 | pendine                                      | C <sub>35</sub> H <sub>34</sub> N <sub>2</sub> O <sub>6</sub> | 578.2408 | 183 | 6,7-dimethoxy-2-(2- <i>p</i> -methoxyphenylethyl)chromone | C <sub>20</sub> H <sub>20</sub> O <sub>5</sub>  | 340.1305 |

|           |                                          |                                                               |          |            |                                                            |                                                 |          |
|-----------|------------------------------------------|---------------------------------------------------------------|----------|------------|------------------------------------------------------------|-------------------------------------------------|----------|
| <b>55</b> | 12'- <i>O</i> -<br>methyldehydrokohatine | C <sub>35</sub> H <sub>34</sub> N <sub>2</sub> O <sub>6</sub> | 578.2408 | <b>184</b> | 6-hydroxy-2-(2-phenylethyl) chromone                       | C <sub>17</sub> H <sub>14</sub> O <sub>3</sub>  | 266.0939 |
| <b>56</b> | 5'-hydroxytelobine                       | C <sub>35</sub> H <sub>34</sub> N <sub>2</sub> O <sub>6</sub> | 578.2408 | <b>185</b> | 6,7-dihydroxy-2-(2-phenylethyl) chromone                   | C <sub>19</sub> H <sub>18</sub> O <sub>4</sub>  | 310.12   |
| <b>57</b> | 1,2-dihydrokurramine                     | C <sub>33</sub> H <sub>30</sub> N <sub>2</sub> O <sub>5</sub> | 534.2147 | <b>186</b> | 6-methoxy-2-(2-phenylethyl) chromone                       | C <sub>18</sub> H <sub>16</sub> O <sub>3</sub>  | 280.1095 |
| <b>58</b> | trilobine                                | C <sub>35</sub> H <sub>34</sub> N <sub>2</sub> O <sub>5</sub> | 562.2459 | <b>187</b> | 6-hydroxy-2-[2-(4'-methoxyphenyl)ethyl]<br>chromone        | C <sub>18</sub> H <sub>16</sub> O <sub>4</sub>  | 296.1044 |
| <b>59</b> | nortrilobine                             | C <sub>34</sub> H <sub>32</sub> N <sub>2</sub> O <sub>5</sub> | 548.2303 | <b>188</b> | chrysin                                                    | C <sub>15</sub> H <sub>10</sub> O <sub>4</sub>  | 254.0576 |
| <b>60</b> | tricordatine                             | C <sub>34</sub> H <sub>32</sub> N <sub>2</sub> O <sub>5</sub> | 548.2303 | <b>189</b> | tangeritin                                                 | C <sub>20</sub> H <sub>20</sub> O <sub>7</sub>  | 372.1203 |
| <b>61</b> | isotrilobine                             | C <sub>35</sub> H <sub>36</sub> N <sub>2</sub> O <sub>6</sub> | 580.2564 | <b>190</b> | 5,6,4'-trihydroxy-7,8-dimethoxyflavone                     | C <sub>17</sub> H <sub>14</sub> O <sub>7</sub>  | 330.0735 |
| <b>62</b> | laurifoline                              | C <sub>20</sub> H <sub>24</sub> NO <sub>4</sub>               | 342.1699 | <b>191</b> | 4',5,7,8-tetramethoxy-flavone                              | C <sub>19</sub> H <sub>18</sub> O <sub>6</sub>  | 342.1098 |
| <b>63</b> | <i>N,O</i> -<br>dimethylisocorydine      | C <sub>22</sub> H <sub>28</sub> NO <sub>4</sub><br>+          | 370.2011 | <b>192</b> | 5,7,4'-trihydroxy-8,3'-diprenylflavone                     | C <sub>25</sub> H <sub>26</sub> O <sub>5</sub>  | 406.1773 |
| <b>64</b> | <i>N</i> -methylboldine                  | C <sub>20</sub> H <sub>24</sub> NO <sub>4</sub><br>+          | 342.1699 | <b>193</b> | genkwanin-4'- <i>O</i> - $\beta$ - <i>D</i> -rutinoside    | C <sub>28</sub> H <sub>32</sub> O <sub>14</sub> | 592.1782 |
| <b>65</b> | norisoboldine                            | C <sub>18</sub> H <sub>19</sub> NO <sub>4</sub>               | 313.1309 | <b>194</b> | licoflavone A                                              | C <sub>20</sub> H <sub>18</sub> O <sub>4</sub>  | 322.12   |
| <b>66</b> | magnoflorine                             | C <sub>20</sub> H <sub>24</sub> NO <sub>4</sub>               | 342.1699 | <b>195</b> | bilobetin                                                  | C <sub>31</sub> H <sub>20</sub> O <sub>10</sub> | 552.105  |
| <b>67</b> | stepharine                               | C <sub>18</sub> H <sub>19</sub> NO <sub>3</sub>               | 297.136  | <b>196</b> | sotetsuflavone                                             | C <sub>31</sub> H <sub>20</sub> O <sub>10</sub> | 552.105  |
| <b>68</b> | cocsarmine                               | C <sub>23</sub> H <sub>30</sub> NO <sub>4</sub><br>+          | 384.2167 | <b>197</b> | 5'-methoxy-bilobetin                                       | C <sub>32</sub> H <sub>22</sub> O <sub>11</sub> | 582.1155 |
| <b>69</b> | ( <i>S</i> )-dicentrine                  | C <sub>20</sub> H <sub>21</sub> NO <sub>4</sub>               | 339.1465 | <b>198</b> | hinokiflavone                                              | C <sub>30</sub> H <sub>18</sub> O <sub>10</sub> | 538.0894 |
| <b>70</b> | isoboldine                               | C <sub>19</sub> H <sub>21</sub> NO <sub>4</sub>               | 327.1465 | <b>199</b> | flavanonol                                                 | C <sub>15</sub> H <sub>12</sub> O <sub>3</sub>  | 240.0783 |
| <b>71</b> | norboldine                               | C <sub>18</sub> H <sub>19</sub> NO <sub>4</sub>               | 313.1309 | <b>200</b> | (2 <i>R</i> ,3 <i>R</i> )-3,7-dihydroxy-6-methoxyflavanone | C <sub>16</sub> H <sub>14</sub> O <sub>5</sub>  | 286.0837 |

|           |                                         |                                                      |          |            |                                                      |                                                 |          |
|-----------|-----------------------------------------|------------------------------------------------------|----------|------------|------------------------------------------------------|-------------------------------------------------|----------|
| <b>72</b> | (±)-<br>laurelliptinhexadecan-<br>1-one | C <sub>34</sub> H <sub>49</sub> NO <sub>5</sub>      | 551.3598 | <b>201</b> | 3,4',5-trihydroxy-7-methoxy-8-<br>isopentenylflavone | C <sub>21</sub> H <sub>20</sub> O <sub>6</sub>  | 368.1254 |
| <b>73</b> | (±)-<br>laurelliptinoctadecan-1-<br>one | C <sub>36</sub> H <sub>53</sub> NO <sub>5</sub>      | 579.391  | <b>202</b> | kushenol M                                           | C <sub>30</sub> H <sub>36</sub> O <sub>7</sub>  | 508.2451 |
| <b>74</b> | menisperine                             | C <sub>21</sub> H <sub>26</sub> NO <sub>4</sub><br>+ | 356.1855 | <b>203</b> | kushenol J                                           | C <sub>27</sub> H <sub>32</sub> O <sub>14</sub> | 580.1782 |
| <b>75</b> | trilobinine                             | C <sub>20</sub> H <sub>24</sub> NO <sub>4</sub><br>+ | 342.1699 | <b>204</b> | isosilybin                                           | C <sub>26</sub> H <sub>24</sub> O <sub>10</sub> | 496.1362 |
| <b>76</b> | <i>N</i> -methylboldine                 | C <sub>20</sub> H <sub>23</sub> NO <sub>4</sub>      | 327.1465 | <b>205</b> | kushenol H                                           | C <sub>26</sub> H <sub>32</sub> O <sub>8</sub>  | 472.2088 |
| <b>77</b> | peruvianine                             | C <sub>18</sub> H <sub>13</sub> NO <sub>4</sub>      | 307.0841 | <b>206</b> | isoanhydroicaritin                                   | C <sub>22</sub> H <sub>24</sub> O <sub>6</sub>  | 384.1566 |
| <b>78</b> | haiderine                               | C <sub>18</sub> H <sub>21</sub> NO <sub>4</sub>      | 315.1465 | <b>207</b> | corylin                                              | C <sub>20</sub> H <sub>16</sub> O <sub>4</sub>  | 320.1044 |
| <b>79</b> | palmatine                               | C <sub>21</sub> H <sub>22</sub> NO <sub>4</sub><br>+ | 352.1543 | <b>208</b> | licoricone                                           | C <sub>22</sub> H <sub>22</sub> O <sub>6</sub>  | 382.141  |
| <b>80</b> | oxypalmatine                            | C <sub>21</sub> H <sub>21</sub> NO <sub>5</sub>      | 367.1414 | <b>209</b> | genistin                                             | C <sub>21</sub> H <sub>20</sub> O <sub>10</sub> | 432.105  |
| <b>81</b> | <i>N</i> -methylcoclaurine              | C <sub>18</sub> H <sub>21</sub> NO <sub>3</sub>      | 299.1516 | <b>210</b> | sophoraisoflavone A                                  | C <sub>20</sub> H <sub>16</sub> O <sub>6</sub>  | 352.0942 |
| <b>82</b> | coclaurine                              | C <sub>17</sub> H <sub>19</sub> NO <sub>3</sub>      | 285.136  | <b>211</b> | odoratin-7- <i>O</i> -β- <i>D</i> -glucoside         | C <sub>23</sub> H <sub>24</sub> O <sub>11</sub> | 476.1311 |
| <b>83</b> | ( <i>S</i> )-reticuline                 | C <sub>19</sub> H <sub>23</sub> NO <sub>4</sub>      | 329.1621 | <b>212</b> | 2',6'-dihydroxy-4,4'-dimethoxydihydrochalcone        | C <sub>17</sub> H <sub>18</sub> O <sub>5</sub>  | 302.1149 |

|           |                             |                                                      |          |            |                                                                               |                                                 |          |
|-----------|-----------------------------|------------------------------------------------------|----------|------------|-------------------------------------------------------------------------------|-------------------------------------------------|----------|
| <b>84</b> | laudanine                   | C <sub>20</sub> H <sub>25</sub> NO <sub>4</sub>      | 343.1777 | <b>213</b> | 2',6'-dihydroxy-4'-methoxy-dihydrochalcone                                    | C <sub>16</sub> H <sub>16</sub> O <sub>4</sub>  | 272.1044 |
| <b>85</b> | oblongine                   | C <sub>19</sub> H <sub>24</sub> NO <sub>3</sub><br>+ | 314.175  | <b>214</b> | 3',5',β-Trihydroxy-3,4,4',α-tetramethoxychalcone                              | C <sub>15</sub> H <sub>12</sub> O <sub>2</sub>  | 224.0834 |
| <b>86</b> | isococclaurine              | C <sub>17</sub> H <sub>20</sub> NO <sub>3</sub>      | 286.1438 | <b>215</b> | 7-hydroxy-3',4'dimethoxy-isoflavan-5',2'-di- <i>O</i> -β- <i>D</i> -glucoside | C <sub>29</sub> H <sub>38</sub> O <sub>16</sub> | 642.2148 |
| <b>87</b> | cohirsine                   | C <sub>20</sub> H <sub>25</sub> NO <sub>4</sub>      | 343.1777 | <b>216</b> | 3'- <i>O</i> -Methylviolanone                                                 | C <sub>18</sub> H <sub>18</sub> O <sub>6</sub>  | 330.1098 |
| <b>88</b> | cohirsinine                 | C <sub>19</sub> H <sub>23</sub> NO <sub>4</sub>      | 329.1621 | <b>217</b> | methyl ophiopogonanone A                                                      | C <sub>19</sub> H <sub>18</sub> O <sub>6</sub>  | 342.1098 |
| <b>89</b> | shaheenine                  | C <sub>18</sub> H <sub>21</sub> NO <sub>4</sub>      | 315.1465 | <b>218</b> | methyl ophiopogonone A                                                        | C <sub>19</sub> H <sub>16</sub> O <sub>6</sub>  | 340.0942 |
| <b>90</b> | cohrisitine                 | C <sub>24</sub> H <sub>29</sub> NO <sub>7</sub>      | 443.1936 | <b>219</b> | 6-hydroxy-2-[2-3'-methoxy-4'-hydroxy-phenyl)ethyl]chromone                    | C <sub>18</sub> H <sub>16</sub> O <sub>5</sub>  | 312.0993 |
| <b>91</b> | jamtinine                   | C <sub>20</sub> H <sub>23</sub> NO <sub>5</sub>      | 357.157  | <b>220</b> | cyclomorusin                                                                  | C <sub>25</sub> H <sub>22</sub> O <sub>6</sub>  | 418.141  |
| <b>92</b> | ( <i>R</i> )-ophiocarpinone | C <sub>20</sub> H <sub>19</sub> NO <sub>5</sub>      | 353.1258 | <b>221</b> | morusin hydroperoxide                                                         | C <sub>25</sub> H <sub>24</sub> O <sub>8</sub>  | 452.1464 |

|            |                                     |                                                      |          |            |                                                                   |                                                 |          |
|------------|-------------------------------------|------------------------------------------------------|----------|------------|-------------------------------------------------------------------|-------------------------------------------------|----------|
| <b>93</b>  | stepholidine                        | C <sub>19</sub> H <sub>21</sub> NO <sub>4</sub>      | 339.1465 | <b>222</b> | sanggenon A                                                       | C <sub>25</sub> H <sub>24</sub> O <sub>7</sub>  | 436.1515 |
| <b>94</b>  | 4-methoxy-13,14-dihydrooxypalmatine | C <sub>22</sub> H <sub>25</sub> NO <sub>6</sub>      | 399.1675 | <b>223</b> | (-)-epicatechin-pentaacetate                                      | C <sub>25</sub> H <sub>24</sub> O <sub>11</sub> | 500.1311 |
| <b>95</b>  | 4-methoxypalmatine                  | C <sub>22</sub> H <sub>24</sub> NO <sub>5</sub><br>+ | 382.1648 | <b>224</b> | (3R,4S)-3,4-dihydroxy-3-(3',4'-dimethoxybenzyl)-7-methoxy-chroman | C <sub>19</sub> H <sub>22</sub> O <sub>6</sub>  | 346.141  |
| <b>96</b>  | coclanoline                         | C <sub>20</sub> H <sub>24</sub> NO <sub>4</sub><br>+ | 342.1699 | <b>225</b> | bavachromanol                                                     | C <sub>20</sub> H <sub>20</sub> O <sub>5</sub>  | 340.1305 |
| <b>97</b>  | coccoline                           | C <sub>17</sub> H <sub>17</sub> NO <sub>3</sub>      | 283.1204 | <b>226</b> | 3'-O-angeloylhamaudol                                             | C <sub>20</sub> H <sub>22</sub> O <sub>6</sub>  | 358.141  |
| <b>98</b>  | coccolinine                         | C <sub>18</sub> H <sub>19</sub> NO <sub>3</sub>      | 297.136  | <b>227</b> | psorachalcone A                                                   | C <sub>20</sub> H <sub>20</sub> O <sub>5</sub>  | 340.1305 |
| <b>99</b>  | coccudienone                        | C <sub>18</sub> H <sub>19</sub> NO <sub>3</sub>      | 297.136  | <b>228</b> | nordracorhodin                                                    | C <sub>16</sub> H <sub>12</sub> O <sub>3</sub>  | 252.0783 |
| <b>100</b> | cocculidinone                       | C <sub>18</sub> H <sub>21</sub> NO <sub>3</sub>      | 299.1516 | <b>229</b> | 3'-deoxysappanol                                                  | C <sub>16</sub> H <sub>16</sub> O <sub>5</sub>  | 288.0993 |
| <b>101</b> | cocconvine                          | C <sub>17</sub> H <sub>19</sub> NO <sub>2</sub>      | 269.1411 | <b>230</b> | (3R,4S)-4',7-dimethoxy-3'-deoxysappanol                           | C <sub>18</sub> H <sub>20</sub> O <sub>5</sub>  | 316.1305 |
| <b>102</b> | cocconvinine                        | C <sub>18</sub> H <sub>21</sub> NO <sub>2</sub>      | 283.1567 | <b>231</b> | methylophiopogonanone B                                           | C <sub>19</sub> H <sub>20</sub> O <sub>5</sub>  | 328.1305 |
| <b>103</b> | cocculolidine                       | C <sub>15</sub> H <sub>19</sub> NO <sub>3</sub>      | 261.136  | <b>232</b> | 5,7-dihydroxy-6-methyl-3-(4'-hydroxybenzyl)chroman-4-one          | C <sub>17</sub> H <sub>16</sub> O <sub>5</sub>  | 300.0993 |
| <b>104</b> | isococculidine                      | C <sub>18</sub> H <sub>23</sub> NO <sub>2</sub>      | 285.1723 | <b>233</b> | 3'-deoxysappanone B                                               | C <sub>18</sub> H <sub>18</sub> O <sub>5</sub>  | 314.1149 |
| <b>105</b> | cocculimine                         | C <sub>18</sub> H <sub>23</sub> NO <sub>3</sub>      | 301.1672 | <b>234</b> | methylophiopogonone B                                             | C <sub>19</sub> H <sub>18</sub> O <sub>5</sub>  | 326.1149 |
| <b>106</b> | isococculine                        | C <sub>17</sub> H <sub>21</sub> NO <sub>2</sub>      | 271.1567 | <b>235</b> | 5,7-dihydroxy-3-(4'-hydroxybenzyl) chromone                       | C <sub>16</sub> H <sub>12</sub> O <sub>5</sub>  | 284.0681 |

|            |                            |                                                               |          |            |                                                                                                                   |                                                  |          |
|------------|----------------------------|---------------------------------------------------------------|----------|------------|-------------------------------------------------------------------------------------------------------------------|--------------------------------------------------|----------|
| <b>107</b> | cocclafine                 | C <sub>16</sub> H <sub>19</sub> NO <sub>2</sub>               | 257.1411 | <b>236</b> | 6-hydroxy-7-methoxy-2-(2-phenylethyl) chromone                                                                    | C <sub>18</sub> H <sub>16</sub> O <sub>4</sub>   | 296.1044 |
| <b>108</b> | cocculidine                | C <sub>18</sub> H <sub>23</sub> NO <sub>2</sub>               | 285.1723 | <b>237</b> | 20-hydroxyecdysone                                                                                                | C <sub>27</sub> H <sub>44</sub> O <sub>7</sub>   | 480.3075 |
| <b>109</b> | cocculine                  | C <sub>17</sub> H <sub>21</sub> NO <sub>2</sub>               | 271.1567 | <b>238</b> | makisterone A                                                                                                     | C <sub>28</sub> H <sub>46</sub> O <sub>7</sub>   | 494.3231 |
| <b>110</b> | cocculitine                | C <sub>18</sub> H <sub>23</sub> NO <sub>3</sub>               | 301.1672 | <b>239</b> | β-sitosterol                                                                                                      | C <sub>29</sub> H <sub>50</sub> O                | 414.3849 |
| <b>111</b> | coccutrine                 | C <sub>18</sub> H <sub>23</sub> NO <sub>3</sub>               | 301.1672 | <b>240</b> | daucosterol                                                                                                       | C <sub>35</sub> H <sub>60</sub> O <sub>6</sub>   | 576.4374 |
| <b>112</b> | dihydroerysodine           | C <sub>18</sub> H <sub>23</sub> NO <sub>3</sub>               | 301.1672 | <b>241</b> | cholesta-8,24-Dien-3-ol,4-methyl-, (3.β.,4.α.)-                                                                   | C <sub>28</sub> H <sub>46</sub> O                | 398.3537 |
| <b>113</b> | dihydroerysotrine          | C <sub>19</sub> H <sub>25</sub> NO <sub>3</sub>               | 315.1828 | <b>242</b> | stigmasteryl tosylate                                                                                             | C <sub>36</sub> H <sub>54</sub> O <sub>3</sub> S | 566.378  |
| <b>114</b> | dihydroerysovine           | C <sub>18</sub> H <sub>23</sub> NO <sub>3</sub>               | 301.1672 | <b>243</b> | 4,22-stigmastadiene-3-one                                                                                         | C <sub>29</sub> H <sub>46</sub> O                | 410.3537 |
| <b>115</b> | cocculitinine              | C <sub>17</sub> H <sub>21</sub> NO <sub>3</sub>               | 287.1516 | <b>244</b> | ethyl iso-allocholate                                                                                             | C <sub>27</sub> H <sub>48</sub> O <sub>5</sub>   | 452.3489 |
| <b>116</b> | erythramide                | C <sub>19</sub> H <sub>24</sub> N <sub>2</sub> O <sub>3</sub> | 328.1781 | <b>245</b> | stigmasterol                                                                                                      | C <sub>29</sub> H <sub>48</sub> O                | 412.3693 |
| <b>117</b> | erythroculine              | C <sub>20</sub> H <sub>25</sub> NO <sub>4</sub>               | 343.1777 | <b>246</b> | syringaresinol                                                                                                    | C <sub>22</sub> H <sub>26</sub> O <sub>8</sub>   | 432.1651 |
| <b>118</b> | <i>O</i> -methylcoccutrine | C <sub>19</sub> H <sub>25</sub> NO <sub>3</sub>               | 315.1828 | <b>247</b> | <i>N</i> -trans-feruloyltyramine                                                                                  | C <sub>18</sub> H <sub>19</sub> NO <sub>4</sub>  | 313.1309 |
| <b>119</b> | erythlaurine               | C <sub>20</sub> H <sub>25</sub> NO <sub>5</sub>               | 359.1726 | <b>248</b> | phytol                                                                                                            | C <sub>20</sub> H <sub>40</sub> O                | 296.3069 |
| <b>120</b> | carococculine              | C <sub>19</sub> H <sub>23</sub> NO <sub>5</sub>               | 345.157  | <b>249</b> | octadecanoic acid, ethyl ester                                                                                    | C <sub>20</sub> H <sub>40</sub> O <sub>2</sub>   | 312.3018 |
| <b>121</b> | sinococculine              | C <sub>18</sub> H <sub>23</sub> NO <sub>5</sub>               | 333.157  | <b>250</b> | oleic acid                                                                                                        | C <sub>18</sub> H <sub>34</sub> O <sub>2</sub>   | 282.255  |
| <b>122</b> | isosinococculine           | C <sub>18</sub> H <sub>23</sub> NO <sub>5</sub>               | 333.157  | <b>251</b> | sulfurous acid, pentadecyl 2-propyl ester                                                                         | C <sub>18</sub> H <sub>38</sub> O <sub>3</sub> S | 334.2532 |
| <b>123</b> | corsutine                  | C <sub>21</sub> H <sub>27</sub> NO <sub>7</sub>               | 405.178  | <b>252</b> | 4,4,6A,6B,8A,11,11,14B-Octamethyl-1,4,4A,5,6,6A,6B,7,8,8A,9,10,11,12,12A,14,14A,12,12A,14,14A,14B-octadecahydro-2 | C <sub>30</sub> H <sub>48</sub> O                | 424.3693 |



|            |                               |                                                 |          |            |                                            |                                                 |          |
|------------|-------------------------------|-------------------------------------------------|----------|------------|--------------------------------------------|-------------------------------------------------|----------|
| <b>124</b> | 14-<br>hydroxyisostephodoline | C <sub>21</sub> H <sub>27</sub> NO <sub>6</sub> | 389.1831 | <b>253</b> | 9,19-cyclolanost-24-en-3-ol, acetate,(3β)- | C <sub>32</sub> H <sub>52</sub> O <sub>2</sub>  | 468.3954 |
| <b>125</b> | sinoacutine                   | C <sub>19</sub> H <sub>21</sub> NO <sub>4</sub> | 327.1465 | <b>254</b> | 1-hexyl-2-nitrocyclohexane                 | C <sub>12</sub> H <sub>23</sub> NO <sub>2</sub> | 213.1723 |
| <b>126</b> | sebiferine                    | C <sub>20</sub> H <sub>23</sub> NO <sub>4</sub> | 341.1621 | <b>255</b> | cis-Z-.α-bisabolene epoxide                | C <sub>15</sub> H <sub>24</sub> O               | 220.1821 |
| <b>127</b> | N-methylstepharine            | C <sub>19</sub> H <sub>21</sub> NO <sub>3</sub> | 311.1516 | <b>256</b> | (+)-quercitol                              | C <sub>6</sub> H <sub>12</sub> O <sub>5</sub>   | 164.0681 |
| <b>128</b> | laurifine                     | C <sub>19</sub> H <sub>23</sub> NO <sub>3</sub> | 313.1672 | <b>257</b> | (-)-viburnitol                             | C <sub>6</sub> H <sub>12</sub> O <sub>5</sub>   | 164.0681 |
| <b>129</b> | laurifonine                   | C <sub>20</sub> H <sub>25</sub> NO <sub>3</sub> | 327.1828 | <b>258</b> | coclauril                                  | C <sub>8</sub> H <sub>9</sub> NO <sub>2</sub>   | 151.0631 |

**Table S4**

| RT/min | <i>m/z</i> | FC     | <i>P</i> | VIP    | [M+Na] <sup>+</sup> | Formule                                                        | Error(ppm) | RDB | Fragment ions                                                              | Compound |
|--------|------------|--------|----------|--------|---------------------|----------------------------------------------------------------|------------|-----|----------------------------------------------------------------------------|----------|
| 6.17   | 147.0441   | 127.84 | 4.12E-35 | 1.9485 | 169.0325            | C <sub>9</sub> H <sub>6</sub> O <sub>2</sub>                   | 0.3        | 7   | 119.0496, 101.0410, 91.0539,<br>77.0373, 75.0533                           | Unkown   |
| 23.85  | 304.1428   | 24.513 | 1.65E-13 | 2.2099 | 326.1255            | C <sub>16</sub> H <sub>19</sub> N <sub>2</sub> O <sub>4</sub>  | 3.4        | 8.5 | 304.1429, 281.1115, 266.1182,<br>188.0842, 176.0723, 128.0628,<br>115.0550 | Unkown   |
| 2.59   | 336.1436   | 165.43 | 3.01E-39 | 1.8692 | 358.1284            | C <sub>17</sub> H <sub>21</sub> NO <sub>6</sub>                | -1.7       | 8   | 336.1442, 276.1237, 248.1279,<br>200.1084, 110.0607, 105.0703              | Unkown   |
| 17.13  | 342.1335   | 84.761 | 7.57E-29 | 2.1733 | 364.1182            | C <sub>19</sub> H <sub>19</sub> NO <sub>5</sub>                | -0.3       | 11  | 342.1347, 326.1033, 311.0796,<br>265.0881, 164.0715                        | Unkown   |
| 4.46   | 377.0839   | 53.787 | 1.63E-22 | 2.225  | 399.1638            | C <sub>13</sub> H <sub>16</sub> N <sub>2</sub> O <sub>11</sub> | 3.2        | 7   | 215.0515, 163.0390, 89.0351                                                | Unkown   |

---

|       |          |        |          |        |          |                                                               |      |    |                                                     |          |
|-------|----------|--------|----------|--------|----------|---------------------------------------------------------------|------|----|-----------------------------------------------------|----------|
| 53.34 | 384.1434 | 99.686 | 2.89E-31 | 1.6286 | 406.1269 | C <sub>21</sub> H <sub>21</sub> NO <sub>6</sub>               | -2   | 12 | 384.1446, 354.0979, 308.09321,<br>293.0693          | Unkown   |
| 20.38 | 432.1451 | 143.1  | 6.65E-37 | 2.158  | 454.1255 | C <sub>25</sub> H <sub>21</sub> NO <sub>6</sub>               | -2.1 | 3  | 432.1459, 414.1355, 402.1364,<br>268.0987, 174.0567 | Unkown   |
| 22.97 | 520.2129 | 193.52 | 7.92E-42 | 2.3302 | 542.1939 | C <sub>33</sub> H <sub>29</sub> NO <sub>5</sub>               | 2    | 20 | 520.2124, 489.1715, 458.1529,<br>277.0848, 147.0674 | Unkown   |
| 21.49 | 563.2188 | 199.07 | 2.68E-42 | 2.3505 | 585.2057 | C <sub>34</sub> H <sub>30</sub> N <sub>2</sub> O <sub>6</sub> | 2    | 21 | 563.2190, 545.2074, 437.1439,<br>364.1417           | Unkown   |
| 24.79 | 598.2654 | 138.7  | 2.10E-36 | 2.3402 | 620.2535 | C <sub>32</sub> H <sub>39</sub> NO <sub>10</sub>              | 1.2  | 14 | 598.2648, 436.2141, 3287.1556,<br>275.1076          | Coumarin |

---

Note: "RDB" means that is the unsaturation of the compound.

**Table S5**

| RT/min | <i>m/z</i> | FC     | <i>P</i> | VIP      | [M+Na] <sup>+</sup>               | Formule                                                        | Error(ppm) | RDB | Fragment ions                                       | Compound |
|--------|------------|--------|----------|----------|-----------------------------------|----------------------------------------------------------------|------------|-----|-----------------------------------------------------|----------|
| 54.36  | 261.2221   | 12.833 | 2.13E-32 | 1.516563 | 283.2263                          | C <sub>18</sub> H <sub>28</sub> O                              | 3.1        | 5   | 243.2122, 159.1183, 147.1193,<br>119.0881, 107.0879 | Unkown   |
| 54.37  | 279.2312   | 18.335 | 5.55E-33 | 1.509106 | 301.1422                          | C <sub>18</sub> H <sub>30</sub> O <sub>2</sub>                 | -2.4       | 4   | 201.0477, 173.1330, 149.0238,<br>109.1023, 95.0859  | Unkown   |
| 54.7   | 295.2271   | 10.194 | 3.03E-25 | 1.481581 | 317.2087                          | C <sub>18</sub> H <sub>30</sub> O <sub>3</sub>                 | 1.1        | 4   | 277.2176, 231.2112, 165.1127,<br>151.1127, 147.1184 | Unkown   |
| 23.06  | 679.5108   | 218430 | 4.75E-50 | 1.538095 | 701.493                           | C <sub>35</sub> H <sub>70</sub> N <sub>2</sub> O <sub>10</sub> | 0.7        | 2   | 679.5113m 548.4171, 322.2499,<br>209.1642           | Unkown   |
| 25.52  | 453.3428   | 57070  | 7.02E-47 | 1.537757 | [2M+H] <sup>+</sup> :<br>905.6794 | C <sub>23</sub> H <sub>48</sub> O <sub>8</sub>                 | 1.3        | 0   | 435.3375, 387.3066, 114.0921,<br>96.0799            | Unkown   |

Note: "RDB" means that is the unsaturation of the compound.
